# Supplementary material for: Update and Evaluation of a High-Throughput In Vitro Mass Balance Distribution Model: IV-MBM EQP v2.0
Source: MDPI journal article supplement (doi:10.3390/toxics9110315), 2021-11-20
Supplement: s1 [file s1]

# Supplementary Materials: Update and Evaluation of a High-Throughput In Vitro Mass Balance Distribution Model: IV-MBM EQP v2.0

James M. Armitage, Alessandro Sangion, Rohan Parmar, Alexandra B. Looky and Jon A. Arnot

| Section | Contents                                                                                   | Page |
|---------|--------------------------------------------------------------------------------------------|------|
| S1      | Additional details on the IV-MBM EQP v2.0 tool                                             | SI-1 |
| S2      | Comparison of spLFRs for predicting sorption to plastic (log $K_{PW}$ )                    | SI-2 |
| S3      | Blood-water and plasma-water partitioning                                                  | SI-3 |
| S4      | Additional details on model evaluation data sets                                           | SI-4 |
| S5      | Additional details on illustrative model application                                       | SI-6 |
| S6      | Relationships between partitioning properties and empirical C24/C0 ratios for Schug et al. | SI-7 |
| S7      | IV-MBM EQP v2.0 - Phys-Chem Inputs                                                         | SI-8 |
|         | References                                                                                 | SI-8 |

## Section S1. Additional details on the IV-MBM EQP v2.0 tool

### 1.1. Sorption to anionic phospholipids

Schmitt [1] noted that the sorption of basic ionizable organic chemicals (IOCs) to anionic phospholipids (e.g., phosphatidylserine) appears to be substantially greater than sorption to “neutral” phospholipids (e.g., phosphatidylcholine) while the opposite is likely for acidic IOCs due to the type of electrostatic interactions possible for the two phospholipid types.

The IV-MBM EQP v2.0 tool allows the user to specify the fraction of phospholipids in the cell that are anionic and then a proportionality constant which is used to relate the sorption capacity of anionic phospholipids to neutral phospholipids. The default fraction of anionic phospholipids in the cell is 0.175 and the default proportionality constants are 20 for basic IOCs and 0.05 for acidic IOCs. In other words, the partition ratio of a given chemical for anionic phospholipids is assumed to be 20-fold larger for bases and 20-fold smaller for acids relative to the partition ratio for neutral phospholipids. The overall membrane-water partitioning is then calculated using these inputs and the partitioning estimates for neutral phospholipids

### 1.2. Preliminary treatment of lysosomal sequestration

The IV-MBM EQP v2.0 tool allows the user to specify the fraction of the cell occupied by lysosomes, the median diameter (nm) of the lysosomes and the pH of the lysosomal fluid. The default fraction of cell occupied by lysosomes and diameter are 0.0068 and 500 nm. The default pH of the lysosomal fluid is 5.1. The enhancement to the sorption capacity of the cell for basic IOCs is then calculated from the pH difference (i.e., ion trapping multiplier) and the volume of cell occupied by lysosome and ‘normal’ cell constituents.

### 1.3. Estimating partitioning properties of neutral organics and IOCs

As described in the main text, the IV-MBM EQP v2.0 tool can be used to simulate IOCs using the minimal set of inputs which include molecular weight (MW), melting point (MP), IOC type (Acid or Base), pKa and octanol-water partition ratio of the neutral

form ( $\log K_{OW,N}$ ). In the absence of any other user-entered partitioning data, spLFRs are used to estimate the required biopartitioning data, i.e.,

Membrane-water partitioning

$$\log K_{MW,N} = 1.01 \log K_{OW,N} + 0.12 \quad [2]$$

Serum albumin-water partitioning

If  $\log K_{OW,N} < 4.5$

$$\log K_{SaW,N} = 1.08 \log K_{OW,N} - 0.70$$

If  $\log K_{OW,N} \geq 4.5$

$$\log K_{SaW,N} = 0.37 \log K_{OW,N} + 2.56 \quad [3]$$

These spLFRs are applied to both neutral organics and the neutral form of IOCs. The partitioning properties of the charged form of the chemical is estimated using scaling factors i.e.,

$$\log K_{MW,I} = \log K_{MW,N} - dMW$$

**Table S1.** Scaling factors to relate the partitioning properties of neutral and charged forms of IOCs.

| Property            | Scaling Factor | Default for acidic IOCs | Default for basic IOCs |
|---------------------|----------------|-------------------------|------------------------|
| Octanol-water       | dOW            | 3.1                     | 3.1                    |
| DOM-water           |                |                         |                        |
| Membrane-water      | dMW            | 1.0                     | 1.0                    |
| Serum albumin-water | dSaW           | 0.0                     | 1.3                    |
| Plastic-water       | dPIW           | 3.1                     | 3.1                    |

pH-dependent distribution ratios are then calculated following the standard procedures, e.g., see Schwarzenbach et al. [4].

See the Supporting Information of Armitage et al. [5] for details on other aspects of the IV-MBM EQP v2.0 tool related to temperature and salinity (ionic strength) adjusted property values.

## Section S2. Comparison of spLFRs for predicting sorption to plastic ( $\log K_{PIW}$ )

The predicted plastic-water partition ratios ( $\log K_{PIW}$ ) are plotted as a function of hydrophobicity ( $\log K_{OW}$ ) for the two spLFRs given in the main text (Eq 5, 6) in Figure S1. The spLFR derived by Fischer et al. [6] in units of  $m^3/m^2$  using sorption data over a 48 h period rather than from data for the full experimental duration (400 h) is also included in Figure S1.

$$\log K_{PIW} = 0.47 \log K_{OW,N} - 4.64 \quad (S1)$$

For ease of interpretation, the magnitude of difference between the predicted  $\log K_{PIW}$  using equation 5 (Kramer) and 6 (Fischer et al., full sorption data) is plotted as a function of hydrophobicity in Figure S2. As shown in Figure S2, there is reasonable agreement between the spLFRs for chemicals with  $\log K_{OW}$  from 4.0 – 7.5 (within a factor of approximately 5). There are large differences for hydrophilic chemicals ( $\log K_{OW} < 2$ ) but these differences are less of a concern because the predicted mass balance is not strongly influenced by sorption to plastic. The differences for chemicals with  $\log K_{OW}$  from 2.0 to 4.0 and  $\log K_{OW} > 7.5$  are more of a concern because the influence of sorption to plastic on the predicted mass balance is greater. We are not currently able to recommend one spLFR over the other but do note that the Fischer et al. [6] spLFRs were derived using a larger and more diverse set of chemicals.

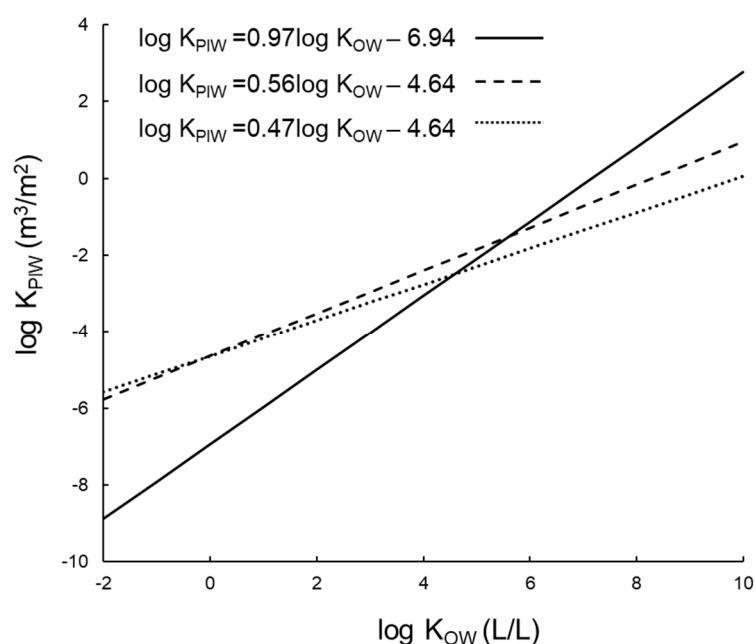

**Figure S1.** Predicted plastic-water partition ratios ( $\log K_{PIW}$ ) as a function of hydrophobicity ( $\log K_{OW}$ ) for the three spLFERs

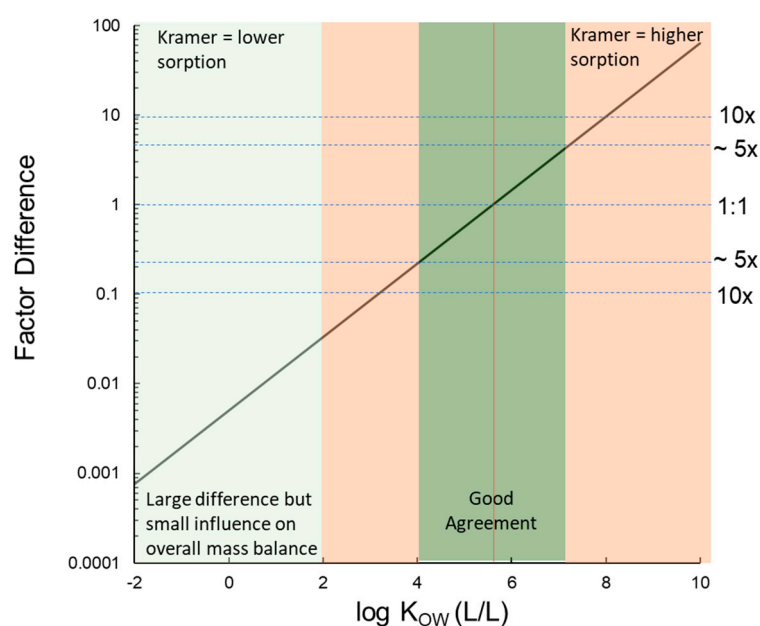

**Figure S2.** Magnitude of difference between the Kramer and Fischer et al. spLFER as a function of hydrophobicity ( $\log K_{OW}$ )

### Section S3. Blood-water and plasma-water partitioning

Blood-water and plasma-water partition or distribution ratios are calculated using partitioning information and the proximate composition of blood and plasma suggested by Endo et al. [7]. Note that these calculations are intended for extrapolation to humans and so the partitioning data are adjusted to pH 7.4, 37 °C and 0.15 M regardless of the assay conditions.

**Table S2.** Proximate composition of blood and plasma assumed by the IV-MBM EQP v2.0 tool.

| Phase  | Storage lipid | Membrane lipid | Bulk protein | Serum albumin | Water  |
|--------|---------------|----------------|--------------|---------------|--------|
| Blood  | 0.0013        | 0.0022         | 0.16         | 0.016         | 0.8205 |
| Plasma | 0.0015        | 0.0008         | 0.015        | 0.029         | 0.9537 |

#### Section S4. Additional information on model evaluation data sets

The selected physical-chemical properties and nominal doses are summarized in the Excel spreadsheet accompanying the Supporting Information. We also recommend that readers consult the original publications [8–11]. Other key input parameters are summarized in the following tables.

**Table S3.** Key input parameters for the Tanneberger et al. [8] simulations.

| Input Parameter                   | Selected Value      |
|-----------------------------------|---------------------|
| <i>Well plate characteristics</i> |                     |
| Well plate size                   | 24                  |
| Well diameter                     | 15.6 mm             |
| Growth area                       | 190 mm <sup>2</sup> |
| Total well volume                 | 3400 µL             |
| Volume of medium added            | 2000 µL             |
| <i>Medium characteristics</i>     |                     |
| Temperature                       | 19 °C               |
| pH                                | 7.4                 |
| Ionic strength                    | 0.15 M              |
| FBS volume fraction (%)           | 0.00                |
| <i>Cell characteristics</i>       |                     |
| Cell seeding density              | 300 000             |
| Mass per cell                     | 0.525 ng            |
| Total mass of cells               | 0.158 mg            |
| Storage lipid content             | 0.01                |
| Membrane lipid content            | 0.04                |
| Protein content                   | 0.055               |
| Water content                     | 0.895               |

**Table S4.** Key input parameters for the Dupraz et al. [9] simulations.

| Input Parameter                   | Selected Value     |
|-----------------------------------|--------------------|
| <i>Well plate characteristics</i> |                    |
| Well plate size                   | 48                 |
| Well diameter                     | 11 mm              |
| Growth area                       | 95 mm <sup>2</sup> |
| Total well volume                 | 1700 µL            |
| Volume of medium added            | 1000 µL            |
| <i>Medium characteristics</i>     |                    |
| Temperature                       | 19 °C              |
| pH                                | 7.4                |
| Ionic strength                    | 0.15 M             |
| FBS volume fraction (%)           | 0.00               |
| <i>Cell characteristics</i>       |                    |
| Cell seeding density              | 20000              |
| Mass per cell                     | 5.0 ng             |
| Total mass of cells               | 0.1 mg             |
| Storage lipid content             | 0.01               |
| Membrane lipid content            | 0.04               |
| Protein content                   | 0.05               |

|               |      |
|---------------|------|
| Water content | 0.90 |
|---------------|------|

**Table S5.** Key input parameters for the Huchthausen et al. [10] simulations.

| Input Parameter                                       | Selected Value     |
|-------------------------------------------------------|--------------------|
| <i>Well plate characteristics</i>                     |                    |
| Well plate size                                       | 96                 |
| Well diameter                                         | 6.4 mm             |
| Growth area                                           | 32 mm <sup>2</sup> |
| Total well volume                                     | 360 µL             |
| Volume of medium added                                | 220 µL             |
| <i>Medium characteristics</i>                         |                    |
| Temperature                                           | 37 °C              |
| pH                                                    | 7.4                |
| Ionic strength                                        | 0.15 M             |
| FBS volume fraction (%) – AREC2                       | 10                 |
| FBS volume fraction (%) – PPAR $\gamma$               | 2.0                |
| <i>Cell characteristics – AREC2</i>                   |                    |
| Cell seeding density                                  | 20000              |
| Mass per cell                                         | 10 ng              |
| Total mass of cells                                   | 0.2 mg             |
| Storage lipid content                                 | 0.00046            |
| Membrane lipid content                                | 0.00414            |
| Protein content                                       | 0.0514             |
| Water content                                         | 0.944              |
| <i>Cell characteristics – PPAR<math>\gamma</math></i> |                    |
| Cell seeding density                                  | 20000              |
| Mass per cell                                         | 7.3 ng             |
| Total mass of cells                                   | 0.146 mg           |
| Storage lipid content                                 | 0.001              |
| Membrane lipid content                                | 0.009              |
| Protein content                                       | 0.08               |
| Water content                                         | 0.91               |

**Table S6.** Key input parameters for the Schug et al. [11] simulations.

| Input Parameter                   | Selected Value      |
|-----------------------------------|---------------------|
| <i>Well plate characteristics</i> |                     |
| Well plate size                   | 24                  |
| Well diameter                     | 15.6 mm             |
| Growth area                       | 190 mm <sup>2</sup> |
| Total well volume                 | 3400 µL             |
| Volume of medium added            | 2000 µL             |
| <i>Medium characteristics</i>     |                     |
| Temperature                       | 19 °C               |
| pH                                | 7.4                 |
| Ionic strength                    | 0.15 M              |
| FBS volume fraction (%)           | 0.0                 |
| <i>Cell characteristics</i>       |                     |
| Cell seeding density              | 120000              |
| Mass per cell                     | 1                   |
| Total mass of cells               | 0.12 mg             |
| Storage lipid content             | 0.01                |
| Membrane lipid content            | 0.04                |
| Protein content                   | 0.055               |
| Water content                     | 0.895               |

### Section S5. Additional details on illustrative model application

The selected physical-chemical properties and nominal doses are summarized in the Excel spreadsheet accompanying the Supporting Information. See [12,13] for cell properties of the two cell lines (MCF7, HCT116)

**Table S7.** Key input parameters for the AEID767 simulations (MCF7 cell line).

| Input Parameter                   | Selected Value      |
|-----------------------------------|---------------------|
| <i>Well plate characteristics</i> |                     |
| Well plate size                   | 1536                |
| Well diameter                     | 1.63 mm             |
| Growth area                       | 2.5 mm <sup>2</sup> |
| Total well volume                 | 12.5 µL             |
| Volume of medium added            | 5.0 µL              |
| <i>Medium characteristics</i>     |                     |
| Temperature                       | 37 °C               |
| pH                                | 7.4                 |
| Ionic strength                    | 0.15                |
| FBS volume fraction (%)           | 10                  |
| <i>Cell characteristics</i>       |                     |
| Cell seeding density              | 1500                |
| Mass per cell                     | 10 ng               |
| Total mass of cells               | 0.015               |
| Storage lipid content             | 0.00046             |
| Membrane lipid content            | 0.00414             |
| Protein content                   | 0.0514              |
| Water content                     | 0.944               |

**Table S8.** Key input parameters for the AEID1325 simulations (HCT116 cell line).

| Input Parameter                   | Selected Value      |
|-----------------------------------|---------------------|
| <i>Well plate characteristics</i> |                     |
| Well plate size                   | 1536                |
| Well diameter                     | 1.63 mm             |
| Growth area                       | 2.5 mm <sup>2</sup> |
| Total well volume                 | 12.5 µL             |
| Volume of medium added            | 5.0 µL              |
| <i>Medium characteristics</i>     |                     |
| Temperature                       | 37 °C               |
| pH                                | 7.4                 |
| Ionic strength                    | 0.15                |
| FBS volume fraction (%)           | 10                  |
| <i>Cell characteristics</i>       |                     |
| Cell seeding density              | 4000                |
| Mass per cell                     | 2.61 ng             |
| Total mass of cells               | 0.01044 mg          |
| Storage lipid content             | 0.00254             |
| Membrane lipid content            | 0.02286             |
| Protein content                   | 0.12                |
| Water content                     | 0.8546              |

### Section S6. Relationships between partitioning properties and empirical C24/C0 ratios for Schug et al.

The empirical C24/C0 ratios for the Schug et al. data set are presented as a function of log K<sub>OW</sub> in Figure S3.

As can be seen in Figure S3, the empirical C24/C0 ratios for chemicals with similar reported partitioning properties can be substantially different. For example, the empirical C24/C0 ratios for chemicals with approximately the same log K<sub>OW</sub> (~ 5.0) and log K<sub>AW</sub> (~ -3.0) range from 0.30 to 0.74. On the other hand, Verdox (log K<sub>OW</sub> 4.75, log K<sub>AW</sub> -1.09) is reported to have an empirical C24/C0 ratio larger than Veloutone (log K<sub>OW</sub> = 4.70, log K<sub>AW</sub> = -1.49) even though the opposite pattern is expected. Finally, the second most hydrophobic chemical Tonalide (log K<sub>OW</sub> 5.70, log K<sub>AW</sub> -3.19) has a reported empirical C24/C0 ratio 1.5-fold greater than several chemicals that are less hydrophobic (whereas the opposite is also expected). Volatilization out of the test system cannot explain these results given the log K<sub>AW</sub> of these chemicals.

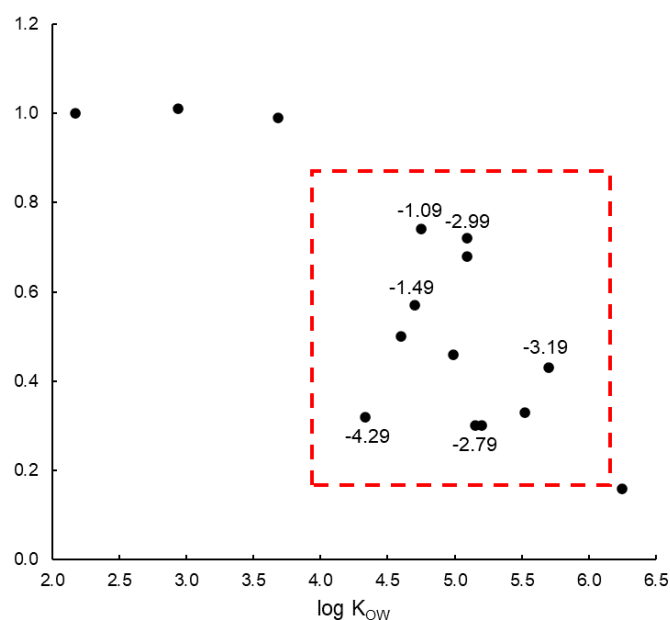

**Figure S3.** Empirical C24/C0 ratios for the Schug et al. data set as a function of log K<sub>OW</sub>. Air-water partition coefficients (log K<sub>AW</sub>) are given on the plot for select chemicals.

### Section S7. IV-MBM EQP v2.0 - Phys-Chem Inputs

Provided as a separate Microsoft Excel® file:

IV-MBM EQP v2.0 - Phys-Chem Inputs.xlsx

### References

- Schmitt, W. General approach for the calculation of tissue to plasma partition coefficients. *Toxicol In Vitro* **2008**, *22*, 457–467.
- Endo, S.; Escher, B.I.; Goss, K.-U. Capacities of Membrane Lipids to Accumulate Neutral Organic Chemicals. *Environ. Sci. Technol.* **2011**, *45*, 5912–5921.
- Endo, S.; Goss, K.-U. Serum Albumin Binding of Structurally Diverse Neutral Organic Compounds: Data and Models. *Chem. Res. Toxicol.* **2011**, *24*, 2293–2301.
- Schwarzenbach, R.P.; Gschwend, P.M.; Imboden, D.M. *Environmental Organic Chemistry*, 2nd Edition. John Wiley & Sons, Inc.: Hoboken, NJ, USA, 2003.
- Armitage, J.M.; Wania, F.; Arnot, J.A. Application of Mass Balance Models and the Chemical Activity Concept To Facilitate the Use of in Vitro Toxicity Data for Risk Assessment. *Environ. Sci. Technol.* **2014**, *48*, 9770–9779.

6. Fischer, F.C.; Cirpka, O.A.; Goss, K.-U.; Henneberger, L.; Escher, B.I. Application of Experimental Polystyrene Partition Constants and Diffusion Coefficients to Predict the Sorption of Neutral Organic Chemicals to Multiwell Plates in in Vivo and in Vitro Bioassays. *Environ. Sci. Technol.* **2018**, *52*, 13511–13522.
7. Endo, S.; Brown, T.N.; Goss, K.-U. General Model for Estimating Partition Coefficients to Organisms and Their Tissues Using the Biological Compositions and Polyparameter Linear Free Energy Relationships. *Environ. Sci. Technol.* **2013**, *47*, 6630–6639.
8. Tanneberger, K.; Knöbel, M.; Busser, F.J.M.; Sinnige, T.L.; Hermens, J.L.M.; Schirmer, K. Predicting Fish Acute Toxicity Using a Fish Gill Cell Line-Based Toxicity Assay. *Environ. Sci. Technol.* **2013**, *47*, 1110–1119.
9. Dupraz, V.; Stachowski-Haberkorn, S.; Wicquart, J.; Tapie, N.; Budzinski, H.; Akcha, F. Demonstrating the need for chemical exposure characterisation in a microplate test system: toxicity screening of sixteen pesticides on two marine microalgae. *Chemosphere* **2019**, *221*, 278–291.
10. Huchthausen, J.; Mühlenbrink, M.; König, M.; Escher, B.I.; Henneberger, L. Experimental Exposure Assessment of Ionizable Organic Chemicals in In Vitro Cell-Based Bioassays. *Chem. Res. Toxicol.* **2020**, *33*, 1845–1854.
11. Schug, H.; Maner, J.; Hülkamp, M.; Begnaud, F.; Debonneville, C.; Berthaud, F.; Gimeno, S.; Schirmer, K. Extending the concept of predicting fish acute toxicity in vitro to the intestinal cell line RTgutGC. *Altex* **2020**, *37*, 37–46.
12. Fischer, F.C.; Henneberger, L.; König, M.; Bittermann, K.; Linden, L.; Goss, K.-U.; Escher, B.I. Modeling Exposure in the Tox21 in Vitro Bioassays. *Chem. Res. Toxicol.* **2017**, *30*, 1197–1208.
13. Henneberger, L.; Mühlenbrink, M.; Fischer, F.C.; Escher, B.I. C18-Coated Solid-Phase Microextraction Fibers for the Quantification of Partitioning of Organic Acids to Proteins, Lipids, and Cells. *Chem. Res. Toxicol.* **2019**, *32*, 168–178.
