# Supplementary material for: Update and Evaluation of a High-Throughput In Vitro Mass Balance Distribution Model: IV-MBM EQP v2.0
Source: Toxics. 2021 Nov 20;9(11):315. doi: 10.3390/toxics9110315 (PMC8625852; doi:10.3390/toxics9110315)
Supplement: Supplementary file 1 [file toxics-09-00315-s001.zip › IV-MBM EQP v2.0 - Phys-Chem Inputs.xlsx]

## Sheet: Tanneberger et al.
Name	CAS	SMILES	MW (g/mol)	MP (oC)	dSM, J/mol/K	IOC Type	pKa	log KOW,N	log KOW,I	dUOW, J/mol	log KMW,N	log KMW,I	dUMW, J/mol	log KSaW,N	log KSaW,I	log KAW,N	dUAW, J/mol	CSAT,W,N (mg/L)	log KPLASTIC,N m3/m2	log KPLASTIC,I m3/m2	Ksalt	ECx in μM
di-n-butylphthalate			278.35	-35		N		4.5								-4.31		11.2				0.835586
hexachlorophene			406.9	166.5		A	5.15	7.54								-10.45		0.09				0.0491521
Caffeine			194.2	238		N		-0.07								-8.83		21600				14037.1
hexamethylenetetramine			140.2	65.1		N		-4.15								-7.17		449000				98787.4
Malathion			330.4	2.8		N		2.36								-6.7		143				39.3462
pentachlorophenol			266.3	174		A	4.7	5.12								-6		14				0.0751033
2,4-dinitrophenol			184.1	118.5		N		-1.24								-5.45		2790				4.12819
2,2,3-trichloroethanol			149.4	19		N		1.42								-5.2		83300				712.851
parathion ethyl			291.3	6.1		N		3.83								-4.91		11				2.88363
diethylphthalate			222.2	-40.5		N		2.42								-4.6		1080				310.531
4-chlorophenol			128.6	42.7		N		2.39								-4.59		24000				93.3126
permethrin			391.3	34		N		6.5								-4.12		0.006				23.0003
Aniline			93.1	-6		N		0.9								-4.08		36000				4749.73
disulfoton			274.4	-25		N		4.02								-4.05		16.3				9.11079
4-fluoroaniline			111.1	-0.8		N		1.15								-4.04		11200				1913.59
246-trichlorophenol			197.5	69		N		2.85								-3.97		800				10.1266
Allyl alcohol			58.1	-129		N		0.17								-3.69		1000000				14359.7
lindane			290.8	112.5		N		4.14								-3.68		8				33.3563
N-methylaniline			107.2	-57		N		1.66								-3.44		5620				1509.33
3,4-dichloroaniline			162	46.2		N		2.69								-3.22		92				47.8395
4-decylaniline			233.4	103.5		N		6.04								-2.96		0.21				2.39931
naphthalene			128.2	80.2		N		3.3								-1.75		31				219.189
124-trichlorobenzene			181.5	17		N		4.02								-1.24		49				78.2369
1,2-dichlorobenzene			147	-16.7		N		3.43								-1.1		80				182.993
dichloromethane			84.9	-95.1		N		1.25								-0.88		13000				17656.1
tetrachloroethylene			165.8	-22.3		N		3.4								-0.14		206				195.416
2,3-dimethyl-1,3-butadiene			82.2	-76		N		3.13								0.31		326				1000

## Sheet: Dupraz et al.
Name	CAS	SMILES	MW (g/mol)	MP (oC)	dSM, J/mol/K	IOC Type	pKa	log KOW,N	log KOW,I	dUOW, J/mol	log KMW,N	log KMW,I	dUMW, J/mol	log KSaW,N	log KSaW,I	log KAW,N	dUAW, J/mol	CSAT,W,N (mg/L)	log KPLASTIC,N m3/m2	log KPLASTIC,I m3/m2	Ksalt	ECx in μM
Isoproturon			206.3	108.8		N		2.5								-8.34		65				0.00402327
Fipronil			437.2	203.9		N		3.75								-7.46		1.9				0.000125801
Metazachlor			277.8	164.1		N		2.13								-7.64		671				0.00352772
Glyphosate			169.1	204.2		N		-3.2								-10.07		10500				0.00425784
AMPA			111	61.6		N		-1.63								-13.29		1000000				0.0145045
a-cypermethrin			416.3	82.1		N		5.5								-4.77		0.115				0.497238
Acrinathin			541.5	81.5		N		5.24								-6.32		0.02				3.13943e-05
Chlorpyrifos			350.6	82.9		N		4.7								-3.92		1.12				0.0256703
Chlorpyrifos-methyl			258.7	123.8		N		4.24								-4.92		0.311				0.169695
Azoxystrobin			403.4	228.1		N		2.5								-11.53		6				0.00193356
Kresoxim-methyl			313.4	137.4		N		3.4								-6.84		2				0.0136567
Quinoxyfen			308.1	148.1		N		4.66								-6.4		0.116				0.00204479
Spiroxamine			297.5	105.8		N		2.89								-5.36		470				0.0010084

## Sheet: Huchthausen et al.
Name	CAS	SMILES	MW (g/mol)	MP (oC)	dSM, J/mol/K	IOC Type	pKa	log KOW,N	log KOW,I	dUOW, J/mol	log KMW,N	log KMW,I	dUMW, J/mol	log KSaW,N	log KSaW,I	log KAW,N	dUAW, J/mol	CSAT,W,N (mg/L)	log KPLASTIC,N m3/m2	log KPLASTIC,I m3/m2	Ksalt	ECx in μM
Caffeine	58-08-2		194.19	236.1		N		-0.07			0.08	0.08		1.66	1.66	-9.4		21600				2440
Lamotrigine	84057-84-1		256.1	189.2		B	5.34	2.57			2.06	2.06		2.16	2.16	-9		139.7				439
Venlafaxine	99300-78-4		277.4	216		B	8.4	0.43			1.64	1.64		1.58	1.58	-16.3		4371				211
Metoprolol	56392-17-7		267.7	116.2		B	9.68	1.88			1.42	1.42		1.51	1.51	-11.2		4777				231
Diphenhydramine	147-24-0		255.36	168		B	8.98	1.59			2.17	2.17		1.99	1.99	-14		602.4				36
Propranolol	318-98-9		259.4	164		B	9.42	0.74			2.73	2.73		1.78	1.78	-17.6		3009				18.4
Diclofenac	15307-79-6		295.14	284		A	4.15	0.7			2.64	2.64		4.4	4.4	-9.7		2425				2.12
2,4-Dichlorophenoxyacetic	94-75-7		221.04	138		A	2.9	2.81			2.02	2.02		3.56	3.56	-6.4		682				49.2
(S)-Naproxen	22204-53-1		230.27	153		A	4.15	3.18			2.17	2.17		5.21	5.21	-7.86		44.1				17.7
Ibuprofen	15687-27-1		206.29	76		A	4.45	3.97			1.81	1.81		4.02	4.02	-5.21		21				316
Torasemide	56211-40-6		348.42	225.3		A	6.68	3.37			2.05	2.05		3.81	3.81	-14.7		8.39				184
Warfarin	81-81-2		308.34	161.5		A	4.9	2.7			1.62	1.62		3.46	3.46	-7.96		17				242

## Sheet: Schug et al.
Name	CAS	SMILES	MW (g/mol)	MP (oC)	dSM, J/mol/K	IOC Type	pKa	log KOW,N	log KOW,I	dUOW, J/mol	log KMW,N	log KMW,I	dUMW, J/mol	log KSaW,N	log KSaW,I	log KAW,N	dUAW, J/mol	CSAT,W,N (mg/L)	log KPLASTIC,N m3/m2	log KPLASTIC,I m3/m2	Ksalt	LOW DOSE ECx in μM	HIGH DOSE ECx in μM
Eugenol F			164.2	60.6		N		1.83								-4.48853		1154				6.09013	1827.04
Methyl-antranilate			151.2	55.8		N		2.17								-4.48853		2790				165.344	5291.01
Lilyfore			176.3	71.32		N		2.94								-5.18853		609				11.3443	680.658
Damascone beta			192.3	52.5		N		3.68								-1.88853		194				5.20021	104.004
Helvetol			228.4	63.71		N		4.33								-4.28853		37.5				10.9457	175.131
Pamplewood			208.3	25		N		4.6								-0.688528		7.07				0.480077	48.0077
Veloutone	14595-54-1	C1CCCCCC(=O)CC/C=C\CCCC1	196.3	25		N		4.7								-1.48853		18.9				0.509424	61.1309
Verdox	82356-51-2	O=C1CC(C/C=C/CCCCCCCCC1)C	198.3	25		N		4.75								-1.08853		10				5.04286	75.643
Nirvanol	1506-02-1	Cc1cc2c(cc1C(=O)C)C(CC(C2(C)C)C)(C)C	222.4	25		N		4.99								-2.08853		13				0.44964	26.9784
Cetalox			236.4	74.13		N		5.09								-2.98853		1.9				1.05753	21.1506
Cachalox			236.4	25		N		5.09								-1.58853		1.9				0.423012	25.3807
Exaltenone			222.4	25		N		5.15								-2.78853		2.9				0.44964	11.241
Alpinolide			282.4	25		N		5.2								-4.58853		1.94				0.0354108	14.1643
Muscenone delta			236.4	51.94		N		5.52								-2.58853		0.1				0.423012	16.9205
Tonalide			258.4	106.87		N		5.7								-3.18853		1.2				0.0386997	7.73994
Vulcanolide			258.4	105.42		N		6.25								-3.38853		0.03				0.0967492	1.54799

## Sheet: AEID767
Name	CAS	SMILES	MW (g/mol)	MP (oC)	dSM, J/mol/K	IOC Type	pKa	log KOW,N	log KOW,I	dUOW, J/mol	log KMW,N	log KMW,I	dUMW, J/mol	log KSaW,N	log KSaW,I	log KAW,N	dUAW, J/mol	CSAT,W,N (mg/L)	log KPLASTIC,N m3/m2	log KPLASTIC,I m3/m2	Ksalt	ECx in μM
Vitamin D3	67-97-0	CC(C)CCCC(C)C1CCC2C(CCCC12C)=CC=C1CC(O)CCC1=C	384.65	84.5		A	14.74	10.24								-2.0268		2.224e-05				82.6033
4,4'-Butane-1,1-diylbis(2-tert-butyl-5-methylphenol)	85-60-9	CCCC(C1=CC(=C(O)C=C1C)C(C)(C)C)C1=CC(=C(O)C=C1C)C(C)(C)C	382.59	199.79		A	10.44	9.09								-8.39421		0.0002598				16.9985
C.I. Direct Red 81 disodium salt	2610-11-9	OC1=C(N=NC2=CC=C(C=C2)N=NC2=CC=C(C=C2)S(O)(=O)=O)C(=CC2=CC(NC(=O)C3=CC=CC=C3)=CC=C12)S(O)(=O)=O	631.64	349.84		A	-0.26	4.23								-30.0832		0.0003441				24.0324
Retinol acetate	127-47-9	CC(=O)OCC=C(C)C=CC=C(C)C=CC1=C(C)CCCC1(C)C	328.5	114.98		N		8.63								-0.508859		0.0003555				60.4577
2,2'-Methylenebis(ethyl-6-tert-butylphenol)	88-24-4	CCC1=CC(CC2=C(O)C(=CC(CC)=C2)C(C)(C)C)=C(O)C(=C1)C(C)(C)C	368.56	119		A	11.37	8.95								-8.51696		0.0004124				30.4712
Docusate sodium	577-11-7	CCCCC(CC)COC(=O)CC(C(=O)OCC(CC)CCCC)S(O)(=O)=O	422.58	165.48		A	0.08	6.1								-9.68956		0.001227				49.6246
Anazolene sodium	3861-73-2	OC1=CC(=CC2=CC(=CC(N=NC3=C4C=CC=C(C4=C(NC4=CC=CC=C4)C=C3)S(O)(=O)=O)=C12)S(O)(=O)=O)S(O)(=O)=O	629.63	349.84		A	-0.07	2.23								-31.9261		0.001401				18.3338
Ethyl linolenate	1191-41-9	CCOC(=O)CCCCCCCC=CCC=CCC=CCC	306.49	77.6		N		8.08								-0.221211		0.001424				112.206
Cyclosporin A	59865-13-3	CCC1NC(=O)C(C(O)C(C)CC=CC)N(C)C(=O)C(C(C)C)N(C)C(=O)C(CC(C)C)N(C)C(=O)C(CC(C)C)N(C)C(=O)C(C)NC(=O)C(C)NC(=O)C(CC(C)C)N(C)C(=O)C(NC(=O)C(CC(C)C)N(C)C(=O)CN(C)C1=O)C(C)C	1202.64	349.84		N		1								-10		0.001866				21.3464
4,4'-Thiobis(6-tert-butyl-m-cresol)	96-69-5	CC1=CC(O)=C(C=C1SC1=C(C)C=C(O)C(=C1)C(C)(C)C)C(C)(C)C	358.54	162		A	10.76	8.24								-9.94762		0.001906				16.662
Bromocriptine	25614-03-3	CC(C)CC1N2C(=O)C(NC(=O)C3CN(C)C4CC5=C(Br)NC6=CC=CC(=C56)C4=C3)(OC2(O)C2CCCN2C1=O)C(C)C	654.61	349.84		A	9.6	4.03								-23.3632		0.001991				29.8336
2-(8-Heptadecenyl)-2-imidazoline-1-ethanol	95-38-5	CCCCCCCCC=CCCCCCCCC1=NCCN1CCO	350.59	175.53		B	10.08	7.51								-6.64034		0.002354				45.5557
1,1,2,2-(4,4',4'',4'''-Tetraglycidyloxyphenyl)ethane	7328-97-4	C(OC1=CC=C(C=C1)C(C(C1=CC=C(OCC2CO2)C=C1)C1=CC=C(OCC2CO2)C=C1)C1=CC=C(OCC2CO2)C=C1)C1CO1	622.72	307.17		N		5.46								-17.8395		0.002485				93.9767
3-Methylcholanthrene	56-49-5	CC1=C2CCC3=C4C=CC5=CC=CC=C5C4=CC(C=C1)=C23	268.36	180		N		6.42								-3.6692		0.0029				0.246005
2-Ethylhexyl-2-cyano-3,3-diphenylacrylate	6197-30-4	CCCCC(CC)COC(=O)C(C#N)=C(C1=CC=CC=C1)C1=CC=CC=C1	361.49	180.84		N		6.88								-6.91141		0.003808				23.0975
1,4-Bis(N-isopropylamino)anthraquinone	14233-37-5	CC(C)NC1=CC=C(NC(C)C)C2=C1C(=O)C1=CC=CC=C1C2=O	322.41	195.13		B	6.13	6.07								-12.6147		0.004586				41.795
Retinal	116-31-4	CC(C=CC=C(C)C=CC1=C(C)CCCC1(C)C)=CC=O	284.45	63		N		7.6								-1.31665		0.004883				7.04575
C.I. Disperse Blue 27	15791-78-3	OCCC1=CC=C(NC2=CC=C(O)C3=C2C(=O)C2=C(C=CC(O)=C2C3=O)[N+]([O-])=O)C=C1	420.38	288.01		A	3.92	5.95								-19.0363		0.00555				57.8769
Tetrabromobisphenol A bis(2-hydroxyethyl) ether	4162-45-2	CC(C)(C1=CC(Br)=C(OCCO)C(Br)=C1)C1=CC(Br)=C(OCCO)C(Br)=C1	631.98	107		A	13.76	4.97								-11.143		0.005643				36.624
1,2,5,6,9,10-Hexabromocyclododecane	3194-55-6	BrC1CCC(Br)C(Br)CCC(Br)C(Br)CCC1Br	641.7	180.03		N		7.74								-2.72577		0.0086				56.6588
4-Dodecylphenol	104-43-8	CCCCCCCCCCCCC1=CC=C(O)C=C1	262.44	117.12		A	10.14	7.91								-3.2424		0.01347				48.6386
Methyl linoleate	112-63-0	CCCCCC=CCC=CCCCCCCCC(=O)OC	294.48	-35		N		6.82								-0.288158		0.01981				78.9278
2,2'-Methylenebis(4-methyl-6-tert-butylphenol)	119-47-1	CC1=CC(CC2=CC(C)=CC(=C2O)C(C)(C)C)=C(O)C(=C1)C(C)(C)C	340.51	123		A	11.32	6.25								-8.76322		0.02				25.317
Pentabromophenol	608-71-9	OC1=C(Br)C(Br)=C(Br)C(Br)=C1Br	488.59	229.5		A	4.43	5.96								-6.63802		0.02605				76.624
Clotrimazole	23593-75-1	ClC1=C(C=CC=C1)C(N1C=CN=C1)(C1=CC=CC=C1)C1=CC=CC=C1	344.85	148		B	6.12	6.26								-5.89437		0.02984				5.41751
4,4'-Methylenebis(2,6-diethylaniline)	13680-35-8	CCC1=CC(CC2=CC(CC)=C(N)C(CC)=C2)=CC(CC)=C1N	310.49	193.59		B	4.88	6.34								-7.94762		0.04145				107.921
2,2,4-Trimethylpentane-1,3-diyl dibenzoate	68052-23-3	CC(C)C(OC(=O)C1=CC=CC=C1)C(C)(C)COC(=O)C1=CC=CC=C1	354.45	56.71		N		6								-5.31298		0.04347				69.8017
Hexanoic acid, 2-ethyl-, diester with tetraethylene glycol	18268-70-7	CCCCC(CC)C(=O)OCCOCCOCCOCCOC(=O)C(CC)CCCC	446.63	89.1		N		5.33								-8.59404		0.04411				57.3115
Tribromsalan	87-10-5	OC1=C(Br)C=C(Br)C=C1C(=O)NC1=CC=C(Br)C=C1	449.93	227		A	6	5.97								-9.38421		0.04551				21.0625
Oxacycloheptadecan-2-one	109-29-5	O=C1CCCCCCCCCCCCCCCO1	254.42	33.75		N		6.65								-0.899978		0.04727				76.141
Valencene	4630-07-3	CC1CCC=C2CCC(CC12C)C(C)=C	204.36	29.52		N		6.3								1.45032		0.05011				53.6448
Clomiphene citrate (1:1)	50-41-9	CCN(CC)CCOC1=CC=C(C=C1)C(=C(Cl)C1=CC=CC=C1)C1=CC=CC=C1	405.97	186.51		B	9.6	6.74								-7.95078		0.05038				1.73103
Bromocresol green sodium salt	62625-32-5	CC1=C(Br)C(O)=C(Br)C=C1C(C1=CC=CC=C1S(O)(=O)=O)=C1C=C(Br)C(=O)C(Br)=C1C	698.02	315.57		A	-0.9	4.01								-18.4224		0.05179				23.4192
Linalyl cinnamate	78-37-5	CC(C)=CCCC(C)(OC(=O)C=CC1=CC=CC=C1)C=C	284.4	84.83		N		6.37								-2.77574		0.05483				46.3256
1-Bromododecane	143-15-7	CCCCCCCCCCCCBr	249.24	-9.5		N		6.58								0.894773		0.05761				58.8488
Dicyclohexylcarbodiimide	538-75-0	C1CCC(CC1)N=C=NC1CCCCC1	206.33	34.5		N		6.83								-1.36322		0.05929				1.71491
7,12-Dimethylbenz(a)anthracene	57-97-6	CC1=C2C=CC=CC2=C(C)C2=C3C=CC=CC3=CC=C12	256.35	122.5		N		5.8								-3.81334		0.061				46.9122
Econazole nitrate	24169-02-6	ClC1=CC=C(COC(CN2C=CN=C2)C2=C(Cl)C=C(Cl)C=C2)C=C1	381.69	206.82		B	6.68	5.61								-6.87001		0.06464				0.160967
Menthyl anthranilate	134-09-8	CC(C)C1CCC(C)CC1OC(=O)C1=C(N)C=CC=C1	275.39	122.14		B	2.17	6.28								-5.54779		0.07403				46.5366
Sclareol	515-03-7	CC(O)(CCC1C(C)(O)CCC2C(C)(C)CCCC12C)C=C	308.51	96		A	14.49	6								-3.89577		0.08174				52.3787
1-(2-Chlorophenyl)-1-(4-chlorophenyl)-2,2-dichloroethane	53-19-0	ClC(Cl)C(C1=CC=C(Cl)C=C1)C1=C(Cl)C=CC=C1	320.05	77		N		5.87								-3.47631		0.1				58.8523
all-trans-Retinoic acid	302-79-4	CC(C=CC1=C(C)CCCC1(C)C)=CC=CC(C)=CC(O)=O	300.44	181		A	4.73	6.3								-3.4108		0.1263				0.00451101
13-cis Retinoic acid	4759-48-2	CC(C=CC1=C(C)CCCC1(C)C)=CC=CC(C)=CC(O)=O	300.44	181		A	4.73	6.3								-3.4108		0.1263				0.00423924
Lauryl gallate	1166-52-5	CCCCCCCCCCCCOC(=O)C1=CC(O)=C(O)C(O)=C1	338.45	96		A	7.93	6.21								-13.4426		0.1371				28.6287
(-)-Isolongifolene	1135-66-6	[H]C12CCC3(C1)C(=CCCC3(C)C)C2(C)C	204.36	48.5		N		5.78								0.901506		0.1401				57.383
Octadecyl sulfate sodium salt	1120-04-3	CCCCCCCCCCCCCCCCCCOS(O)(=O)=O	350.56	173.26		A	-3.29	5.37								-4.38853		0.16				62.8301
2,2'-Dibenzoylaminodiphenyl disulfide	135-57-9	O=C(NC1=CC=CC=C1SSC1=C(NC(=O)C2=CC=CC=C2)C=CC=C1)C1=CC=CC=C1	456.58	315.9		A	12.54	4.59								-12.7919		0.1617				12.8253
N-(1-Methylheptyl)-N'-phenyl-1,4-benzenediamine	15233-47-3	CCCCCCC(C)NC1=CC=C(NC2=CC=CC=C2)C=C1	296.46	145.77		B	6.7	5.74								-6.61621		0.1627				184.333
1,1,3,3,5-Pentamethyl-4,6-dinitro-2,3-dihydro-1H-indene	116-66-5	CC1=C(C=C2C(=C1[N+]([O-])=O)C(C)(C)CC2(C)C)[N+]([O-])=O	278.31	132.5		N		5.39								-5.07677		0.1661				24.0868
3,3',5,5'-Tetrabromobisphenol A	79-94-7	CC(C)(C1=CC(Br)=C(O)C(Br)=C1)C1=CC(Br)=C(O)C(Br)=C1	543.88	179		A	8.5	6.53								-8.21827		0.171				48.4319
Tamoxifen	10540-29-1	CCC(=C(C1=CC=CC=C1)C1=CC=C(OCCN(C)C)C=C1)C1=CC=CC=C1	371.53	97		B	8.69	6.3								-7.73628		0.1936				3.77129
Rotenone	83-79-4	COC1=CC2=C(C=C1OC)C1C(CO2)OC2=C3CC(OC3=CC=C2C1=O)C(C)=C	394.43	176		N		4.1								-11.3393		0.2				26.465
Celestolide	13171-00-1	CC(=O)C1=CC(=CC2=C1CCC2(C)C)C(C)(C)C	244.38	96.07		N		5.93								-2.8861		0.2202				47.4231
3,5-Dichlorosalicyl-3,4-dichloroanilide	1154-59-2	OC1=C(C=C(Cl)C=C1Cl)C(=O)NC1=CC=C(Cl)C(Cl)=C1	351.02	161		A	6.08	5.87								-8.70548		0.2233				5.87514
4-(Dimethylamino)azobenzene	60-11-7	CN(C)C1=CC=C(C=C1)N=NC1=CC=CC=C1	225.3	117		B	3.29	4.58								-5.01931		0.23				45.4262
4-(Butan-2-yl)-2,6-di-tert-butylphenol	17540-75-9	CCC(C)C1=CC(=C(O)C(=C1)C(C)(C)C)C(C)(C)C	262.44	102.22		A	11.85	6.43								-3.404		0.2479				37.5554
Fumagillin	23110-15-8	COC1C(CCC2(CO2)C1C1(C)OC1CC=C(C)C)OC(=O)C=CC=CC=CC=CC(O)=O	458.56	194.5		A	4.17	4.79								-13.3166		0.2653				7.89285
Clomipramine hydrochloride	17321-77-6	CN(C)CCCN1C2=CC=CC=C2CCC2=CC=C(Cl)C=C12	314.86	189.5		B	9.46	5.19								-6.51463		0.2935				86.902
5-Cyclohexadecen-1-one	37609-25-9	O=C1CCCCCCCCCCC=CCCC1	236.4	53.15		N		5.82								-1.50543		0.2997				96.8189
Resmethrin	10453-86-8	CC(C)=CC1C(C(=O)OCC2=COC(CC3=CC=CC=C3)=C2)C1(C)C	338.45	32		N		6.14								-5.26468		0.3				64.0438
2,2',2''-[Methanetriyltris(benzene-4,1-diyloxymethanediyl)]trioxirane	66072-38-6	C(OC1=CC=C(C=C1)C(C1=CC=C(OCC2CO2)C=C1)C1=CC=C(OCC2CO2)C=C1)C1CO1	460.53	236.01		N		4.23								-13.4768		0.313				61.9684
1,4-Diaminoanthraquinone	128-95-0	NC1=CC=C(N)C2=C1C(=O)C1=CC=CC=C1C2=O	238.25	268		B	1.17	3								-7.70819		0.33				79.2274
12-Hydroxyoctadecanoic acid	106-14-9	CCCCCCC(O)CCCCCCCCCCC(O)=O	300.49	80		A	4.78	6.41								-7.11902		0.3315				73.8435
Nifedipine	21829-25-4	COC(=O)C1C(C2=C(C=CC=C2)[N+]([O-])=O)C(C(=O)OC)=C(C)N=C1C	346.34	160.03		B	2.04	4.56								-9.12371		0.3386				63.1349
Tri-o-cresyl phosphate	78-30-8	CC1=C(OP(=O)(OC2=C(C)C=CC=C2)OC2=C(C)C=CC=C2)C=CC=C1	368.37	-33		N		5.11								-4.48112		0.36				38.2551
2,4-Di-tert-pentylphenol	120-95-6	CCC(C)(C)C1=CC(=C(O)C=C1)C(C)(C)CC	234.38	25		A	11	6.31								-3.56964		0.4441				21.7545
Thioridazine hydrochloride	130-61-0	CSC1=CC2=C(SC3=CC=CC=C3N2CCC2CCCCN2C)C=C1	370.57	73		B	9.84	5.9								-9.21244		0.56				19.7441
Thioridazine	50-52-2	CSC1=CC2=C(SC3=CC=CC=C3N2CCC2CCCCN2C)C=C1	370.57	73		B	9.84	5.9								-9.21244		0.56				27.1958
Butylated hydroxytoluene	128-37-0	CC1=CC(=C(O)C(=C1)C(C)(C)C)C(C)(C)C	220.36	71		A	12.76	5.1								-3.77363		0.6				41.0084
Triclocarban	101-20-2	ClC1=CC=C(NC(=O)NC2=CC=C(Cl)C(Cl)=C2)C=C1	315.59	255.6		A	12.77	4.9								-8.73339		0.6479				8.12758
Dehydroabietylamine acetate	2026-24-6	CC(C)C1=CC2=C(C=C1)C1(C)CCCC(C)(CN)C1CC2	285.48	132.33		B	10.13	6.29								-3.87398		0.6479				22.4353
Retinol	68-26-8	CC(=CCO)C=CC=C(C)C=CC1=C(C)CCCC1(C)C	286.46	63.5		A	14.09	5.68								-2.32407		0.6713				13.544
Beclazone	5534-09-8	CCC(=O)OCC(=O)C1(OC(=O)CC)C(C)CC2C3CCC4=CC(=O)C=CC4(C)C3(Cl)C(O)CC12C	521.06	237.67		A	13.02	3.97								-13.9719		0.6865				6.67945
Betamethasone dipropionate	5593-20-4	CCC(=O)OCC(=O)C1(OC(=O)CC)C(C)CC2C3CCC4=CC(=O)C=CC4(C)C3(F)C(O)CC12C	504.6	232		A	12.87	4.07								-13.2212		0.7239				12.0696
Folpet	133-07-3	ClC(Cl)(Cl)SN1C(=O)C2=C(C=CC=C2)C1=O	296.56	177		B	-3.34	2.85								-5.5043		0.8				4.39973
Chlorothalonil	1897-45-6	ClC1=C(Cl)C(C#N)=C(Cl)C(C#N)=C1Cl	265.91	252.1		N		2.9								-4.99059		0.81				0.849667
3-Hydroxy-N-(3-nitrophenyl)naphthalene-2-carboxamide	135-65-9	OC1=CC2=C(C=CC=C2)C=C1C(=O)NC1=CC=CC(=C1)[N+]([O-])=O	308.3	231.24		A	8.65	5.01								-11.5989		0.8981				5.59353
Tolylfluanid	731-27-1	CN(C)S(=O)(=O)N(SC(F)(Cl)Cl)C1=CC=C(C)C=C1	347.25	96		B	-5.06	3.9								-4.50714		0.9				4.30251
2,5-Bis(2-methylbutan-2-yl)benzene-1,4-diol	79-74-3	CCC(C)(C)C1=CC(O)=C(C=C1O)C(C)(C)CC	250.38	180		A	11.21	5.83								-7.55284		0.9327				24.4756
Binapacryl	485-31-4	CCC(C)C1=CC(=CC(=C1OC(=O)C=C(C)C)[N+]([O-])=O)[N+]([O-])=O	322.32	70		N		4.49								-5.26142		1				44.1716
Isocyclemone E	54464-57-2	CC1CC2=C(CC1(C)C(C)=O)C(C)(C)CCC2	234.38	85.76		N		5.18								-1.71643		1.077				69.6425
Acetylcedrene	32388-55-9	[H]C12CC3(CC(C(C)=O)=C1C)C(C)CCC3C2(C)C	246.4	91.67		N		5.02								-2.22121		1.278				71.6577
Dichlofluanid	1085-98-9	CN(C)S(=O)(=O)N(SC(F)(Cl)Cl)C1=CC=CC=C1	333.22	106		B	-5.37	3.7								-5.81104		1.3				4.39882
12-Oxahexadecanolide	6707-60-4	O=C1CCCCCCCCCCOCCCCO1	256.39	46.8		N		4.9								-3.0789		1.433				115.133
Bis(2-butoxyethyl) phthalate	117-83-9	CCCCOCCOC(=O)C1=CC=CC=C1C(=O)OCCOCCCC	366.46	-55		N		4.06								-7.91724		1.675				71.3498
1,4-Dioxacycloheptadecane-5,17-dione	105-95-3	O=C1CCCCCCCCCCCC(=O)OCCO1	270.37	71.08		N		4.71								-3.89298		1.719				60.9257
Hexachlorocyclopentadiene	77-47-4	ClC1=C(Cl)C(Cl)(Cl)C(Cl)=C1Cl	272.77	-9		N		5.04								0.0428355		1.8				34.6702
3-(5,5,6-Trimethylbicyclo[2.2.1]hept-2-yl)cyclohexanol	3407-42-9	CC1C2CC(CC2C2CCCC(O)C2)C1(C)C	236.4	87.6		A	15.28	5.5								-3.17901		1.817				48.1112
Danazol	17230-88-5	CC12CCC3C(CCC4=CC5=C(CC34C)C=NO5)C1CCC2(O)C#C	337.47	225.6		A	13.1	4.21								-7.53605		1.883				50.6201
Nortriptyline hydrochloride	894-71-3	CNCCC=C1C2=C(CCC3=C1C=CC=C3)C=CC=C2	263.39	129.81		B	10	4.51								-5.89437		2.216				25.2637
2-Ethylhexyl p-hydroxybenzoate	5153-25-3	CCCCC(CC)COC(=O)C1=CC=C(O)C=C1	250.34	108.87		A	8.2	5.36								-5.97023		2.365				21.1435
2,6-Di-tert-butylphenol	128-39-2	CC(C)(C)C1=CC=CC(=C1O)C(C)(C)C	206.33	39		A	12.16	4.92								-3.81566		2.5				78.481
Chlorpromazine hydrochloride	69-09-0	CN(C)CCCN1C2=C(SC3=C1C=C(Cl)C=C3)C=CC=C2	318.87	167.13		B	9.41	5.41								-7.8215		2.55				67.0485
Bis(1-piperidinylthioxomethyl)hexasulfide	971-15-3	S=C(SSSSSSC(=S)N1CCCCC1)N1CCCCC1	448.79	242.44		B	0.84	4.43								-2.17901		2.569				0.305411
Vinclozolin	50471-44-8	CC1(OC(=O)N(C1=O)C1=CC(Cl)=CC(Cl)=C1)C=C	286.12	108		B	-3.43	3.1								-6.14798		2.6				57.6526
N-[3-(Dimethylamino)propyl]dodecanamide	3179-80-4	CCCCCCCCCCCC(=O)NCCCN(C)C	284.49	150.12		B	9.45	4.4								-7.82624		2.623				35.9488
N-(1,3-Dimethylbutyl)-N'-phenyl-p-phenylenediamine	793-24-8	CC(C)CC(C)NC1=CC=C(NC2=CC=CC=C2)C=C1	268.41	121.5		B	6.73	4.47								-6.86219		2.841				53.7347
Tricyclodecanedimethanol diacrylate	42594-17-2	C=CC(=O)OCC1CCC2C3CC(CC3COC(=O)C=C)C12	304.39	21.14		N		4.22								-5.03635		2.877				93.7321
Bisphenol A glycidyl methacrylate	1565-94-2	CC(=C)C(=O)OCC(O)COC1=CC=C(C=C1)C(C)(C)C1=CC=C(OCC(O)COC(=O)C(C)=C)C=C1	512.61	233.5		A	12.64	4.94								-14.7109		3				16.5496
3,3'-Dichlorobenzidine dihydrochloride	612-83-9	NC1=C(Cl)C=C(C=C1)C1=CC(Cl)=C(N)C=C1	253.13	132		B	2.7	3.51								-8.93521		3.1				40.0845
4-Octylphenol	1806-26-4	CCCCCCCCC1=CC=C(O)C=C1	206.33	82.77		A	10.15	5.5								-3.73532		3.114				74.9344
C.I. Acid Violet 12, disodium salt	6625-46-3	COC1=CC=CC=C1N=NC1=C(O)C2=C(NC(C)=O)C=C(C=C2C=C1S(O)(=O)=O)S(O)(=O)=O	495.48	349.84		A	-0.3	0.59								-28.0441		3.379				34.0993
Methyl red	493-52-7	CN(C)C1=CC=C(C=C1)N=NC1=CC=CC=C1C(O)=O	269.31	183		A	3.66	3.83								-9.71551		3.672				67.986
Bisphenol A diglycidyl ether	1675-54-3	CC(C)(C1=CC=C(OCC2CO2)C=C1)C1=CC=C(OCC2CO2)C=C1	340.42	8		N		3.84								-8.74606		3.685				81.0559
Digoxin	20830-75-5	CC1OC(CC(O)C1O)OC1C(O)CC(OC2C(O)CC(OC3CCC4(C)C(CCC5C4CC(O)C4(C)C(CCC54O)C4=CC(=O)OC4)C3)OC2C)OC1C	780.96	349.84		A	13.5	0.5								-24.7201		3.776				0.534026
Acenaphthene	83-32-9	C1CC2=C3C1=CC=CC3=CC=C2	154.21	93.4		N		3.92								-2.12371		3.9				58.869
Dicyclohexyl phthalate	84-61-7	O=C(OC1CCCCC1)C1=C(C=CC=C1)C(=O)OC1CCCCC1	330.43	66		N		6.2								-5.38853		4				67.3959
Phenethyl anthranilate	133-18-6	NC1=CC=CC=C1C(=O)OCCC1=CC=CC=C1	241.29	128.76		B	2.16	4.46								-7.27126		4.073				41.3907
Tetraethylthiuram disulfide	97-77-8	CCN(CC)C(=S)SSC(=S)N(CC)CC	296.52	71.5		B	0.86	3.88								-2.4684		4.09				0.0741093
Bisphenol AF	1478-61-1	OC1=CC=C(C=C1)C(C1=CC=C(O)C=C1)(C(F)(F)F)C(F)(F)F	336.24	161		A	8.74	4.47								-7.63418		4.302				60.423
Allethrin	584-79-2	CC(C)=CC1C(C(=O)OC2CC(=O)C(CC=C)=C2C)C1(C)C	302.42	4		N		4.78								-5.37149		4.6				97.5946
4-(1,1,3,3-Tetramethylbutyl)phenol	140-66-9	CC(C)(C)CC(C)(C)C1=CC=C(O)C=C1	206.33	84.5		A	10.15	5.28								-3.73532		4.821				20.2065
4-Nonylphenol	104-40-5	CCCCCCCCCC1=CC=C(O)C=C1	220.36	-10		A	10.15	5.76								-2.85705		4.9				43.8821
Captan	133-06-2	ClC(Cl)(Cl)SN1C(=O)C2CC=CCC2C1=O	300.59	175		B	-2.68	2.8								-6.54343		5.1				5.75309
Norethindrone acetate	51-98-9	CC(=O)OC1(CCC2C3CCC4=CC(=O)CCC4C3CCC12C)C#C	340.47	161.5		N		3.99								-5.81219		5.34				31.7808
2-Methylundecanal	110-41-8	CCCCCCCCCC(C)C=O	184.32	3.24		N		4.67								-1.32783		5.372				284.605
1-Dodecyl-2-pyrrolidinone	2687-96-9	CCCCCCCCCCCCN1CCCC1=O	253.43	124.24		B	-0.43	4.2								-4.53605		5.42				87.2034
N-Phenyl-2-naphthylamine	135-88-6	N(C1=CC=CC=C1)C1=CC=C2C=CC=CC2=C1	219.29	108		B	0.78	4.38								-5.37569		6.311				47.1322
Tris(1,3-dichloro-2-propyl) phosphate	13674-87-8	ClCC(CCl)OP(=O)(OC(CCl)CCl)OC(CCl)CCl	430.91	27		N		3.65								-6.97189		7				55.3879
o-Aminoazotoluene	97-56-3	CC1=C(N)C=CC(=C1)N=NC1=C(C)C=CC=C1	225.3	102		B	3.01	4.29								-5.8861		7				43.3535
Norethindrone	68-22-4	CC12CCC3C(CCC4=CC(=O)CCC34)C1CCC2(O)C#C	298.43	203.5		A	13.09	2.97								-7.6251		7.04				68.2701
Curcumin	458-37-7	COC1=CC(C=CC(=O)CC(=O)C=CC2=CC(OC)=C(O)C=C2)=CC=C1O	368.39	183		A	8.11	3.29								-19.541		7.475				43.3836
C.I. Basic Violet 14	632-99-5	CC1=CC(=CC=C1N)C(C1=CC=C(N)C=C1)=C1C=CC(=N)C=C1	301.39	210.07		B	6.81	3.74								-10.5657		7.694				11.668
2-(4-Tert-Butylbenzyl)propionaldehyde	80-54-6	CC(CC1=CC=C(C=C1)C(C)(C)C)C=O	204.31	46.29		N		4.36								-2.99233		7.859				52.152
Dichlone	117-80-6	ClC1=C(Cl)C(=O)C2=C(C=CC=C2)C1=O	227.05	195		N		2.83								-7.37993		8				2.56383
Lindane	58-89-9	ClC1C(Cl)C(Cl)C(Cl)C(Cl)C1Cl	290.83	141.5		N		4.14								-3.67757		8				43.8452
Teniposide	29767-20-2	COC1=CC(=CC(OC)=C1O)C1C2C(COC2=O)C(OC2OC3COC(OC3C(O)C2O)C2=CC=CS2)C2=C1C=C1OCOC1=C2	656.66	349.84		A	9.94	1.08								-29.6266		8.127				10.123
Ethyl (2E,4Z)-deca-2,4-dienoate	3025-30-7	CCCCCC=CC=CC(=O)OCC	196.29	10.62		N		4.36								-1.51116		8.588				59.3394
Griseofulvin	126-07-8	COC1=CC(OC)=C(Cl)C2=C1C(=O)C1(O2)C(C)CC(=O)C=C1OC	352.77	220		N		2.18								-11.2362		8.64				6.23023
2,5-Di-tert-butylbenzene-1,4-diol	88-58-4	CC(C)(C)C1=CC(O)=C(C=C1O)C(C)(C)C	222.33	217		A	11.89	4.85								-7.79858		9.145				21.3391
1-Chloro-2,4-dinitrobenzene	97-00-7	[O-][N+](=O)C1=CC(=C(Cl)C=C1)[N+]([O-])=O	202.55	53		N		2.17								-3.99936		9.24				7.41563
Flutamide	13311-84-7	CC(C)C(=O)NC1=CC(=C(C=C1)[N+]([O-])=O)C(F)(F)F	276.22	154.87		A	13.12	3.35								-7.81682		9.451				50.6989
4-Heptylphenol	1987-50-4	CCCCCCCC1=CC=C(O)C=C1	192.3	73.39		A	10.16	5.01								-3.85833		9.645				62.5222
Amitriptyline hydrochloride	549-18-8	CN(C)CCC=C1C2=CC=CC=C2CCC2=C1C=CC=C2	277.41	196.5		B	9.18	4.92								-5.55284		9.71				9.43777
1-(1-(4,4-bis(4-fluorophenyl)butyl)-4-piperidinyl)-1,3-dihydro-2H-Benzimidazol-2-one	2062-78-4	FC1=CC=C(C=C1)C(CCCN1CCC(CC1)N1C(=O)NC2=C1C=CC=C2)C1=CC=C(F)C=C1	461.56	214		B	9.26	6.3								-11.3471		10				30.6562
Triclosan	3380-34-5	OC1=C(OC2=CC=C(Cl)C=C2Cl)C=CC(Cl)=C1	289.55	54		A	7.8	4.76								-6.69043		10				43.2264
Pyrimethamine	58-14-0	CCC1=NC(N)=NC(N)=C1C1=CC=C(Cl)C=C1	248.72	233.5		B	7.22	2.69								-8.3551		10				77.684
Ketoconazole	65277-42-1	CC(=O)N1CCN(CC1)C1=CC=C(OCC2COC(CN3C=CN=C3)(O2)C2=CC=C(Cl)C=C2Cl)C=C1	531.44	146		B	6.88	4.34								-17.6411		10				33.8796
Tetrachlorovinphos	961-11-5	COP(=O)(OC)OC(=CCl)C1=C(Cl)C=C(Cl)C(Cl)=C1	365.97	96		N		3.53								-7.12371		11				35.3553
(3aR)-(+)-Sclareolide	564-20-5	CC12CCC3C(C)(C)CCCC3(C)C1CC(=O)O2	250.38	107.07		N		3.86								-1.61183		11.99				42.1786
Trifluoperazine dihydrochloride	440-17-5	CN1CCN(CCCN2C3=C(SC4=C2C=C(C=C4)C(F)(F)F)C=CC=C3)CC1	407.5	190.35		B	7.66	5.03								-10.2882		12.2				34.6307
2-Thienyl disulfide	6911-51-9	S(SC1=CC=CS1)C1=CC=CS1	230.38	114.62		N		3.95								-3.23319		12.9				52.6515
Chlorophacinone	3691-35-8	ClC1=CC=C(C=C1)C(C(=O)C1C(=O)C2=C(C=CC=C2)C1=O)C1=CC=CC=C1	374.83	140		A	2.61	5.5								-8.93368		13				60.8039
4,4'-Methylenebis(2-chloroaniline)	101-14-4	NC1=C(Cl)C=C(CC2=CC(Cl)=C(N)C=C2)C=C1	267.16	110		B	3.33	3.91								-8.87133		13.9				59.4317
Pentachlorophenol	87-86-5	OC1=C(Cl)C(Cl)=C(Cl)C(Cl)=C1Cl	266.34	174		A	4.68	5.12								-5.99936		14				75.5229
Octylbicycloheptenedicarboximide	113-48-4	CCCCC(CC)CN1C(=O)C2C3CC(C=C3)C2C1=O	275.39	-20		B	-7.53	3.7								-4.75004		15				62.8117
4,4'-Methylenebis(N,N-diglycidylaniline)	28768-32-3	C(C1CO1)N(CC1CO1)C1=CC=C(CC2=CC=C(C=C2)N(CC2CO2)CC2CO2)C=C1	422.53	217.69		B	4.58	2.53								-14.4612		15.33				34.0714
3-Hydroxy-2-naphthoic o-anisidide	135-62-6	COC1=CC=CC=C1NC(=O)C1=CC2=C(C=CC=C2)C=C1O	293.32	216.28		A	8.74	3.99								-10.4229		19.97				29.7326
3-(4-tert-Butylphenyl)propanal	18127-01-0	CC(C)(C)C1=CC=C(CCC=O)C=C1	190.29	46.3		N		3.94								-3.11437		21.05				63.7973
N-(Cyclohexylthio)phthalimide	17796-82-6	O=C1N(SC2CCCCC2)C(=O)C2=C1C=CC=C2	261.34	92.6		B	-2.91	3.66								-5.58235		22				34.5533
Maprotiline hydrochloride	10347-81-6	CNCCCC12CCC(C3=CC=CC=C13)C1=CC=CC=C21	277.41	93		B	10.62	4.52								-5.48707		23.36				31.1535
4-Nitro-N-phenylaniline	836-30-6	[O-][N+](=O)C1=CC=C(NC2=CC=CC=C2)C=C1	214.23	135.3		B	-2.6	3.74								-6.77153		23.62				38.7747
alpha-Amylcinnamyl alcohol	101-85-9	CCCCCC(CO)=CC1=CC=CC=C1	204.31	50.46		A	14.53	4.35								-4.50147		25.72				64.342
Isobutyl 3-phenylacrylate	122-67-8	CC(C)COC(=O)C=CC1=CC=CC=C1	204.27	21.36		N		3.76								-3.4022		25.75				61.4943
2,4,7,9-Tetramethyl-5-decyne-4,7-diol	126-86-3	CC(C)CC(C)(O)C#CC(C)(O)CC(C)C	226.36	89.97		A	12.92	3.61								-5.00114		26.35				284.605
Pentamidine isethionate	140-64-7	NC(=N)C1=CC=C(OCCCCCOC2=CC=C(C=C2)C(N)=N)C=C1	340.43	186		B	12.5	2.79								-14.6922		29.16				37.2155
Thiram	137-26-8	CN(C)C(=S)SSC(=S)N(C)C	240.42	155.6		B	0.87	1.73								-5.12846		30				0.0530346
Dichlorophen	97-23-4	OC1=CC=C(Cl)C=C1CC1=CC(Cl)=CC=C1O	269.13	177.5		A	9.15	4.26								-10.3278		30				31.4535
C.I. Acid Orange 8, monosodium salt	5850-86-2	CC1=CC(=CC=C1N=NC1=C(O)C=CC2=CC=CC=C12)S(O)(=O)=O	342.37	236.97		A	-1.03	2.9								-14.502		32.56				113.962
N,N'-Bis(1-methylpropyl)-1,4-benzenediamine	101-96-2	CCC(C)NC1=CC=C(NC(C)CC)C=C1	220.36	18		B	8.67	3.5								-6.13811		34.93				4.23813
2,4,6-Tris(tert-butyl)phenol	732-26-3	CC(C)(C)C1=CC(=C(O)C(=C1)C(C)(C)C)C(C)(C)C	262.44	131		A	12.61	6.06								-3.404		35				136.893
2,4-Di-tert-butylphenol	96-76-4	CC(C)(C)C1=CC(=C(O)C=C1)C(C)(C)C	206.33	56.5		A	11.56	5.19								-3.81566		35				37.8358
2,4-Diisopropylphenol	2934-05-6	CC(C)C1=CC(C(C)C)=C(O)C=C1	178.28	55.74		A	10.76	4.42								-4.06219		35.52				60.8881
1-Decanol	112-30-1	CCCCCCCCCCO	158.29	6.9		A	15.21	4.57								-2.88338		37				54.0577
Allura Red C.I.16035	25956-17-6	COC1=C(C=C(C)C(=C1)S(O)(=O)=O)N=NC1=C(O)C=CC2=CC(=CC=C12)S(O)(=O)=O	452.46	310.7		A	-1.05	2.03								-22.0601		37.35				40.2926
Daunorubicin	20830-81-3	COC1=CC=CC2=C1C(=O)C1=C(C(O)=C3CC(O)(CC(OC4CC(N)C(O)C(C)O4)C3=C1O)C(C)=O)C2=O	527.53	208		B	8.68	1.83								-23.2332		39.17				3.99374
2-(Thiocyanomethylthio)benzothiazole	21564-17-0	N#CSCSC1=NC2=CC=CC=C2S1	238.34	-10		B	-0.09	3.23								-5.53972		40				19.0165
Furazolidone	67-45-8	[O-][N+](=O)C1=CC=C(O1)C=NN1CCOC1=O	225.16	255		B	-1.98	-0.04								-8.87531		40				26.1145
Dipentaerythritol pentaacrylate	60506-81-2	OCC(COCC(COC(=O)C=C)(COC(=O)C=C)COC(=O)C=C)(COC(=O)C=C)COC(=O)C=C	524.53	210.57		A	13.79	1.79								-19.4113		48.15				2.79389
Ergocalciferol	50-14-6	CC(C)C(C)C=CC(C)C1CCC2C(CCCC12C)=CC=C1CC(O)CCC1=C	396.66	116.5		A	14.74	10.44								-1.96039		50				44.8697
N-Isopropyl-N'-phenyl-p-phenylenediamine	101-72-4	CC(C)NC1=CC=C(NC2=CC=CC=C2)C=C1	226.32	74		B	6.76	3.28								-7.23017		50.32				14.422
Dinoseb	88-85-7	CCC(C)C1=CC(=CC(=C1O)[N+]([O-])=O)[N+]([O-])=O	240.22	40		A	4.08	3.56								-4.72956		52				32.0566
2,2'-Dihydroxy-4-methoxybenzophenone	131-53-3	COC1=CC=C(C(=O)C2=C(O)C=CC=C2)C(O)=C1	244.25	68		A	7.11	3.82								-7.09406		52.73				62.4848
Diphenylamine	122-39-4	N(C1=CC=CC=C1)C1=CC=CC=C1	169.23	52.9		B	0.78	3.5								-3.95878		53				77.8272
Auramine hydrochloride	2465-27-2	CN(C)C1=CC=C(C=C1)C(=N)C1=CC=C(C=C1)N(C)C	267.38	136		B	10.12	2.98								-6.82743		53.54				47.035
Bismaleimide	13676-54-5	O=C1C=CC(=O)N1C1=CC=C(CC2=CC=C(C=C2)N2C(=O)C=CC2=O)C=C1	358.36	298.31		B	-0.4	2.32								-15.3432		57.57				6.29731
Trimethylolpropane triacrylate	15625-89-5	CCC(COC(=O)C=C)(COC(=O)C=C)COC(=O)C=C	296.32	27.19		N		2.75								-7.60965		57.81				3.43304
3,3'-Dimethoxybenzidine dihydrochloride	20325-40-0	COC1=CC(=CC=C1N)C1=CC(OC)=C(N)C=C1	244.3	137		B	4.71	1.81								-11.1308		60				76.802
N-Phenyl-1-naphthylamine	90-30-2	N(C1=CC=CC=C1)C1=C2C=CC=CC2=CC=C1	219.29	62		B	0.78	4.2								-5.37569		60				45.0789
Cumene	98-82-8	CC(C)C1=CC=CC=C1	120.2	-96		N		3.66								-0.32783		61.3				109.589
Chlortetracycline hydrochloride	64-72-2	CN(C)C1C2CC3C(C(=O)C4=C(O)C=CC(Cl)=C4C3(C)O)C(=O)C2(O)C(=O)C(C(N)=O)C1=O	478.89	315.23		B	7.4	1.99								-25.5252		74.5				55.9985
1,6-Hexanediol diacrylate	13048-33-4	C=CC(=O)OCCCCCCOC(=O)C=C	226.27	-29.67		N		3.08								-4.70819		74.86				103.896
2-Tert-Butyl-5-methylphenol	88-60-8	CC1=CC(O)=C(C=C1)C(C)(C)C	164.25	46.5		A	11.45	4.11								-4.18441		76.88				62.4486
1-Dodecanamine	124-22-1	CCCCCCCCCCCCN	185.36	69.5		B	10.67	4.76								-2.15553		78				95.2057
Dodecylamine hydrochloride	929-73-7	CCCCCCCCCCCCN	185.36	69.5		B	10.67	4.76								-2.15553		78				59.2216
Nitrofurantoin	67-20-9	[O-][N+](=O)C1=CC=C(O1)C=NN1CC(=O)NC1=O	238.16	263		A	7.55	-0.47								-10.2647		79.5				21.6669
Lauryldiethanolamine	1541-67-9	CCCCCCCCCCCCN(CCO)CCO	273.46	131.43		B	8.85	3.9								-7.10073		83.13				32.3286
Hexa-2,4-dienyl isobutyrate	16491-24-0	CC=CC=CCOC(=O)C(C)C	168.24	-22.01		N		3.31								-1.48381		93.91				68.3346
Pentaerythritol tetraacrylate	4986-89-4	C=CC(=O)OCC(COC(=O)C=C)(COC(=O)C=C)COC(=O)C=C	352.34	53.05		N		2.11								-10.6342		94.62				3.22323
2-tert-Butyl-6-methylphenol	2219-82-1	CC1=CC=CC(=C1O)C(C)(C)C	164.25	31		A	11.69	3.97								-4.18441		101.3				59.0692
(E,E)-2,4-Decadienal	25152-84-5	CCCCCC=CC=CC=O	152.24	-9.78		N		3.33								-2.04611		105.7				79.0118
Benzyl 4-hydroxybenzoate	94-18-8	OC1=CC=C(C=C1)C(=O)OCC1=CC=CC=C1	228.25	111		A	8.18	3.56								-7.92315		107.8				91.9239
Ethyl methylphenylglycidate	77-83-8	CCOC(=O)C1OC1(C)C1=CC=CC=C1	206.24	67.05		N		3								-4.92914		111.3				272.91
5-(2-Chloro-4-(trifluoromethyl)phenoxy)-2-nitrobenzoic acid	50594-66-6	OC(=O)C1=C(C=CC(OC2=CC=C(C=C2Cl)C(F)(F)F)=C1)[N+]([O-])=O	361.66	150		A	1.93	3.7								-8.60821		120				39.6251
2-Phenylethyl propionate	122-70-3	CCC(=O)OCCC1=CC=CC=C1	178.23	21.44		N		3.06								-2.99233		136				87.1847
Hexachlorophene	70-30-4	OC1=C(CC2=C(Cl)C(Cl)=CC(Cl)=C2O)C(Cl)=C(Cl)C=C1Cl	406.91	166.5		A	6.49	7.54								-10.454		140				5.18576
Clorophene	120-32-1	OC1=C(CC2=CC=CC=C2)C=C(Cl)C=C1	218.68	48.5		A	9.81	3.6								-6.95716		149				24.5443
Phenyl salicylate	118-55-8	OC1=C(C=CC=C1)C(=O)OC1=CC=CC=C1	214.22	130.5		A	8.71	3.82								-4.16322		150				78.2837
3-Iodo-2-propynyl-N-butylcarbamate	55406-53-6	CCCCNC(=O)OCC#CI	281.09	66		A	12.03	2.45								-5.30935		156				5.30061
Menadione	58-27-5	CC1=CC(=O)C2=C(C=CC=C2)C1=O	172.18	107		N		2.2								-6.89857		160				21.4585
4-(2-Methylbutan-2-yl)phenol	80-46-6	CCC(C)(C)C1=CC=C(O)C=C1	164.25	95		A	10.24	3.91								-3.9786		168				26.0659
Diallyl phthalate	131-17-9	C=CCOC(=O)C1=C(C=CC=C1)C(=O)OCC=C	246.26	-70		N		3.23								-4.80194		182				49.2276
Bis(2-ethylhexyl) phosphate	298-07-7	CCCCC(CC)COP(O)(=O)OCC(CC)CCCC	322.43	-50		A	1.47	6.07								-5.77469		182				64.656
Apigenin	520-36-5	OC1=CC=C(C=C1)C1=CC(=O)C2=C(O1)C=C(O)C=C2O	270.24	345		A	6.53	3.02								-14.6793		182.5				63.0622
2-Methyl-4,6-dinitrophenol	534-52-1	CC1=C(O)C(=CC(=C1)[N+]([O-])=O)[N+]([O-])=O	198.14	86.6		A	4.42	2.13								-4.2424		198				52.9637
2,4-Dichloro-3,5-dimethylphenol	133-53-9	CC1=CC(O)=C(Cl)C(C)=C1Cl	191.06	83		A	8.3	3.9								-4.8145		200				98.3564
4-Butylphenol	1638-22-8	CCCCC1=CC=C(O)C=C1	150.22	22		A	10.11	3.65								-4.22716		219.8				36.4965
Chloranil	118-75-2	ClC1=C(Cl)C(=O)C(Cl)=C(Cl)C1=O	245.88	290		N		2.22								-7.87398		250				8.19848
4-Phenoxyphenol	831-82-3	OC1=CC=C(OC2=CC=CC=C2)C=C1	186.21	84		A	10.07	3.35								-6.29862		268.8				63.2435
Melphalan	148-82-3	NC(CC1=CC=C(C=C1)N(CCCl)CCCl)C(O)=O	305.21	182.5		A	2.12	-0.52								-10.7663		270.9				32.3397
Prazosin	19216-56-9	COC1=CC2=NC(=NC(N)=C2C=C1OC)N1CCN(CC1)C(=O)C1=CC=CO1	383.41	279		B	6.52	1.28								-16.1632		310.2				42.6716
2,6-Di-tert-butyl-4-(hydroxymethyl)phenol	88-26-6	CC(C)(C)C1=CC(CO)=CC(=C1O)C(C)(C)C	236.36	139		A	12.01	3.56								-8.20955		312.6				284.605
4-(3-Phenylpropyl)pyridine	2057-49-0	C(CC1=CC=CC=C1)CC1=CC=NC=C1	197.28	82.17		B	6.05	4.04								-4.34321		318.5				41.7972
Zinc dibutyldithiocarbamate	136-23-2	CCCCN(CCCC)C(S)=S	205.38	60.67		A	3.36	3.64								-1.06015		327.1				23.4207
Tripropylene glycol diacrylate	42978-66-5	CC(COC(C)COC(=O)C=C)OCC(C)OC(=O)C=C	300.35	1.79		N		1.82								-8.44851		342.2				38.4486
1,10-Phenanthroline	66-71-7	C1=CC2=C(N=C1)C1=C(C=CC=N1)C=C2	180.21	78		B	5.16	2.51								-8.44405		376				3.80758
2,2',4,4'-Tetrahydroxybenzophenone	131-55-5	OC1=CC(O)=C(C=C1)C(=O)C1=CC=C(O)C=C1O	246.22	200		A	6.98	2.78								-13.831		398.5				197.652
8-Hydroxyquinoline sulfate	134-31-6	OC1=CC=CC2=CC=CN=C12	145.16	226		B	10.26	1.85								-4.63265		417				0.281924
8-Hydroxyquinoline	148-24-3	OC1=CC=CC2=CC=CN=C12	145.16	226		A	5.06	1.85								-4.63265		417				0.933435
beta-Nitrostyrene	102-96-5	[O-][N+](=O)C=CC1=CC=CC=C1	149.15	58		N		2.11								-3.84695		491.9				74.3929
4-Hexylresorcinol	136-77-6	CCCCCCC1=C(O)C=C(O)C=C1	194.28	68		A	10	3.45								-7.96528		500				48.0422
Octhilinone	26530-20-1	CCCCCCCCN1SC=CC1=O	213.34	113.04		B	-2.04	2.45								-6.07256		500				9.53224
Estriol	50-27-1	CC12CCC3C(CCC4=C3C=CC(O)=C4)C1CC(O)C2O	288.39	290		A	10.25	2.45								-10.2647		500				244.831
HC Blue 2	33229-34-4	OCCNC1=C(C=C(C=C1)N(CCO)CCO)[N+]([O-])=O	285.3	93		N		1.7								-13.5716		527.8				40.1032
2-Nitrotoluene	88-72-2	CC1=CC=CC=C1[N+]([O-])=O	137.14	-10		N		2.3								-3.29162		609				31.9039
N,N,N',N'-Tetramethyl-p-phenylenediamine	100-22-1	CN(C)C1=CC=C(C=C1)N(C)C	164.25	51		B	5.92	2.35								-4.25499		646.2				79.902
2-(Morpholin-4-yldithio)-1,3-benzothiazole	95-32-9	C1CN(CCO1)SSC1=NC2=C(S1)C=CC=C2	284.41	135		B	-0.46	1.59								-9.46425		657.6				5.97326
C.I. Solvent Red 140	15905-32-5	OC1=C(I)C2=C(C=C1I)C1(OC(=O)C3=CC=CC=C13)C1=C(O2)C(I)=C(O)C(I)=C1	835.9	303		A	7.21	8.02								-16.9786		700				18.4327
FD&C Red 3	16423-68-0	OC1=C(I)C2=C(C=C1I)C1(OC(=O)C3=CC=CC=C13)C1=C(O2)C(I)=C(O)C(I)=C1	835.9	303		A	7.21	8.02								-16.9786		700				22.5177
2-tert-Butylphenol	88-18-6	CC(C)(C)C1=C(O)C=CC=C1	150.22	-6.8		A	11.34	3.31								-2.98369		700				48.7894
2-Phenylphenol	90-43-7	OC1=C(C=CC=C1)C1=CC=CC=C1	170.21	59		A	10	3.09								-4.58235		700				54.0829
4-Bromoaniline	106-40-1	NC1=CC=C(Br)C=C1	172.03	66.4		B	3.9	2.26								-4.50829		706.7				84.7444
tert-Butylhydroquinone	1948-33-0	CC(C)(C)C1=CC(O)=CC=C1O	166.22	127		A	10.8	2.94								-8.20955		748.2				37.2998
Butyl 3-mercaptopropionate	16215-21-7	CCCCOC(=O)CCS	162.25	-5.56		A	9.66	2.28								-3.10297		753.1				45.5071
2-Naphthalenol	135-19-3	OC1=CC2=C(C=CC=C2)C=C1	144.17	121.6		A	9.57	2.7								-5.95078		755				72.8039
Chlorhexidine	55-56-1	ClC1=CC=C(NC(=N)NC(=N)NCCCCCCNC(=N)NC(=N)NC2=CC=C(Cl)C=C2)C=C1	505.46	154		B	11.51	0.08								-28.3354		800				20.8223
Chlorhexidine diacetate	56-95-1	ClC1=CC=C(NC(=N)NC(=N)NCCCCCCNC(=N)NC(=N)NC2=CC=C(Cl)C=C2)C=C1	505.46	154		B	11.51	0.08								-28.3354		800				25.3002
N,N-Diethyl-p-phenylenediamine	93-05-0	CCN(CC)C1=CC=C(N)C=C1	164.25	65.55		B	8.21	2.24								-5.6618		806.1				32.7896
2,4,4'-Trihydroxybenzophenone	1470-79-7	OC1=CC=C(C=C1)C(=O)C1=CC=C(O)C=C1O	230.22	170.29		A	7.59	2.48								-12.9492		873.4				53.0978
Tetraethylene glycol diacrylate	17831-71-9	C=CC(=O)OCCOCCOCCOCCOC(=O)C=C	302.33	7.11		N		1.26								-10.6266		998.8				18.1549
1,3-Diphenylguanidine	102-06-7	N=C(NC1=CC=CC=C1)NC1=CC=CC=C1	211.27	150		B	10.12	2.89								-9.53605		1000				17.4659
p-Xylenol blue	125-31-5	CC1=CC(=C(C)C=C1O)C1(OS(=O)(=O)C2=C1C=CC=C2)C1=C(C)C=C(O)C(C)=C1	410.49	247.26		A	8.23	5.4								-14.8986		1000				54.414
6-Chlorothymol	89-68-9	CC(C)C1=CC(Cl)=C(C)C=C1O	184.67	63		A	10.17	3.92								-4.43816		1000				58.588
2,2'-[Cyclohexane-1,4-diylbis(methanediyloxymethanediyl)]dioxirane	14228-73-0	C(OCC1CCC(COCC2CO2)CC1)C1CO1	256.35	92.86		N		1.56								-7.70729		1016				53.91
Tris(2-butoxyethyl) phosphate	78-51-3	CCCCOCCOP(=O)(OCCOCCCC)OCCOCCCC	398.48	-70		N		3.75								-9.30935		1100				47.1933
2-Octanol	123-96-6	CCCCCCC(C)O	130.23	-31.6		A	15.44	2.9								-2.29862		1280				87.6682
Carminic acid	1260-17-9	CC1=C2C(=O)C3=C(C(O)=C(O)C(C4OC(CO)C(O)C(O)C4O)=C3O)C(=O)C2=CC(O)=C1C(O)=O	492.4	136		A	1.62	0.97								-29.571		1300				27.3832
N,N-Dimethyl-4-nitrosoaniline	138-89-6	CN(C)C1=CC=C(C=C1)N=O	150.18	92.5		B	-0.9	2.04								-4.43622		1369				11.5814
Rifampicin	13292-46-1	COC1C=COC2(C)OC3=C(C2=O)C2=C(O)C(C=NN4CCN(C)CC4)=C(NC(=O)C(C)=CC=CC(C)C(O)C(C)C(O)C(C)C(OC(C)=O)C1C)C(O)=C2C(O)=C3C	822.96	349.84		A	4.96	4.24								-39.954		1400				73.0867
N-Phenyl-1,4-benzenediamine	101-54-2	NC1=CC=C(NC2=CC=CC=C2)C=C1	184.24	66		B	5.2	1.82								-7.81915		1453				81.6159
Bis(2,3-epoxypropyl) cyclohexane-1,2-dicarboxylate	5493-45-8	O=C(OCC1CO1)C1CCCCC1C(=O)OCC1CO1	284.31	31.35		N		1.19								-9.33545		1460				85.3142
2'-Methoxycinnamaldehyde	1504-74-1	COC1=CC=CC=C1C=CC=O	162.19	33.6		N		1.9								-5.41172		1598				108.036
5-Methyl-2-thiophenecarboxaldehyde	13679-70-4	CC1=CC=C(S1)C=O	126.17	27.51		N		2.08								-3.48273		1600				63.3519
1-Naphthylamine	134-32-7	NC1=CC=CC2=C1C=CC=C2	143.19	49.2		B	4.21	2.25								-5.34321		1700				53.5805
N-(1-Naphthyl)ethylenediamine dihydrochloride	1465-25-4	NCCNC1=C2C=CC=CC2=CC=C1	186.26	106.8		B	9.43	1.82								-8.64267		2000				52.7001
4-tert-Butylcatechol	98-29-3	CC(C)(C)C1=CC(O)=C(O)C=C1	166.22	54.3		A	9.92	2.94								-8.20955		2000				18.3384
1,2-Dibromo-2,4-dicyanobutane	35691-65-7	BrCC(Br)(CCC#N)C#N	265.94	52		N		1.63								-6.46997		2120				24.6402
Diglycidyl resorcinol ether	101-90-6	C(OC1=CC(OCC2CO2)=CC=C1)C1CO1	222.24	42.5		N		1.23								-7.94137		2957				33.535
4-(Diglycidylamino)phenyl glycidyl ether	5026-74-4	C(OC1=CC=C(C=C1)N(CC1CO1)CC1CO1)C1CO1	277.32	127.53		B	4.78	0.87								-10.6767		2996				25.939
Bromophenol blue	115-39-9	OC1=C(Br)C=C(C=C1Br)C1(OS(=O)(=O)C2=C1C=CC=C2)C1=CC(Br)=C(O)C(Br)=C1	669.96	279		A	4.12	6.77								-16.6684		3000				22.4705
Dazomet	533-74-4	CN1CSC(=S)N(C)C1	162.27	106		B	4.04	0.63								-7.96365		3000				3.99026
Dimethipin	55290-64-7	CC1=C(C)S(=O)(=O)CCS1(=O)=O	210.26	165		N		-0.17								-9.0268		4600				55.0211
3-Trifluoromethyl-4-nitrophenol	88-30-2	OC1=CC(=C(C=C1)[N+]([O-])=O)C(F)(F)F	207.11	76		A	6.07	2.87								-6.10523		5000				72.0995
1,2-Benzenedicarboxaldehyde	643-79-8	O=CC1=CC=CC=C1C=O	134.14	55		N		1.43								-5.86348		5346				42.0544
Quercetin	117-39-5	OC1=CC2=C(C(O)=C1)C(=O)C(=O)C(O2)C1=CC(O)=C(O)C=C1	302.24	225.69		A	5.42	1.08								-20.5776		5436				19.1947
Thiocarbazide	2231-57-4	NNC(=S)NN	106.15	170		A	10.58	-2.04								-9.94762		5500				88.6524
Bromcresol green	76-60-8	CC1=C(C=C(Br)C(O)=C1Br)C1(OS(=O)(=O)C2=C1C=CC=C2)C1=C(C)C(Br)=C(O)C(Br)=C1	698.02	218.5		A	4.24	7.86								-16.583		6000				13.8412
Pentaerythritol triacrylate	3524-68-3	OCC(COC(=O)C=C)(COC(=O)C=C)COC(=O)C=C	298.3	40.12		A	13.63	0.91								-12.1684		6832				3.10092
Proxan-sodium	140-93-2	CC(C)OC(S)=S	136.23	-8.88		A	2.57	1.28								-2.85071		6938				98.8276
Diethylene glycol diacrylate	4074-88-8	C=CC(=O)OCCOCCOC(=O)C=C	214.22	-34.73		N		0.84								-7.01013		7082				14.684
2,5-Dimethyl-1,4-dithiane-2,5-diol	55704-78-4	CC1(O)CSC(C)(O)CS1	180.28	92.64		A	12.12	1.03								-9.32407		7234				83.2491
N,N-Dimethyl-p-phenylenediamine	99-98-9	CN(C)C1=CC=C(N)C=C1	136.2	205		B	6.64	1.25								-5.90709		7380				76.6102
4-Ethoxyaniline	156-43-4	CCOC1=CC=C(N)C=C1	137.18	2.4		B	5.26	1.24								-5.21244		7510				205.091
HC Yellow 4	59820-43-8	OCCNC1=C(OCCO)C=C(C=C1)[N+]([O-])=O	242.23	164.42		N		0.56								-13.0268		8704				33.6898
5-Bromo-5-nitro-1,3-dioxane	30007-47-7	[O-][N+](=O)C1(Br)COCOC1	212	62.48		N		0.25								-7.09849		9423				30.185
N-Methyl-p-aminophenol sulfate	55-55-0	CNC1=CC=C(O)C=C1	123.16	135		A	11.31	0.79								-7.75004		10000				10.3624
Thiosemicarbazide	79-19-6	NNC(N)=S	91.13	183		N		-1.67								-7.56898		10000				39.1612
Gallic acid	149-91-7	OC(=O)C1=CC(O)=C(O)C(O)=C1	170.12	253		A	4.33	0.7								-17.3022		11900				75.352
Nitrogen mustard hydrochloride	55-86-7	CN(CCCl)CCCl	156.06	-60		B	6.4	0.91								-3.92464		12000				10.982
Ninhydrin	485-47-2	OC1(O)C(=O)C2=C(C=CC=C2)C1=O	178.15	242		A	8.47	0.67								-8.85961		15060				70.3267
1H-Isoindole-1,3(2H)-diimine	3468-11-9	N=C1NC(=N)C2=C1C=CC=C2	145.16	109.95		B	6.19	0.84								-7.74212		15280				29.3477
3-Methoxycatechol	934-00-9	COC1=CC=CC(O)=C1O	140.14	42.8		A	9.42	0.86								-9.85071		15490				53.5174
4-Aminophenol	123-30-8	NC1=CC=C(O)C=C1	109.13	187.5		A	10.17	0.04								-7.83343		16000				33.0919
Tris(2-hydroxyethyl) isocyanurate	839-90-7	OCCN1C(=O)N(CCO)C(=O)N(CCO)C1=O	261.24	240.76		N		0.07								-18.3632		17790				92.3545
Potassium ethyl xanthate	140-89-6	CCOC(S)=S	122.2	-9.39		A	3.19	0.87								-2.97355		17900				41.8971
SEX	140-90-9	CCOC(S)=S	122.2	-9.39		A	3.19	0.87								-2.97355		17900				51.8252
2-Aminophenol	95-55-6	NC1=C(O)C=CC=C1	109.13	174		A	9.76	0.62								-8.09186		20000				63.7757
4-Methoxyaniline	104-94-9	COC1=CC=C(N)C=C1	123.16	57.2		B	5.21	0.95								-5.56898		21000				104.393
1,2-Benzisothiazolin-3-one	2634-33-5	O=C1NSC2=C1C=CC=C2	151.18	121.6		A	10.19	0.64								-6.54842		21430				24.4884
C.I. Basic Red 9 monohydrochloride	569-61-9	NC1=CC=C(C=C1)C(C1=CC=C(N)C=C1)=C1C=CC(=N)C=C1	287.37	204.65		B	7.03	-0.21								-10.6082		21970				4.06429
Zinc diethyldithiocarbamate	14324-55-1	CCN(CC)C(S)=S	149.27	18.16		A	5.42	1.67								-1.55347		28990				0.050862
Sodium diethyldithiocarbamate	148-18-5	CCN(CC)C(S)=S	149.27	18.16		A	5.42	1.67								-1.55347		28990				4.94112
Tropicamide	1508-75-4	CCN(CC1=CC=NC=C1)C(=O)C(CO)C1=CC=CC=C1	284.36	96.5		A	14.27	1.19								-14.9172		29300				30.6254
3,3',4,4'-Tetraaminobiphenyl tetrahydrochloride	7411-49-6	NC1=CC=C(C=C1N)C1=CC(N)=C(N)C=C1	214.27	175		B	4.39	0.09								-15.579		30980				7.63339
Hematoxylin	517-28-2	OC1=C(O)C2=C(C=C1)C1C3=CC(O)=C(O)C=C3CC1(O)CO2	302.29	140		A	9.16	0.71								-23.8482		35940				54.2177
6-Thioguanine	154-42-7	NC1=NC2=C(NC=N2)C(=S)N1	167.19	219.26		A	6.57	-0.07								-12.722		36300				0.352363
Methylene bis(thiocyanate)	6317-18-6	N#CSCSC#N	130.18	52.13		N		0.34								-5.97189		47040				10.7278
1,3-Dichloropropanone	534-07-6	ClCC(=O)CCl	126.97	45		N		0.27								-3.59965		55240				11.8663
Ethyl 4-chloro-3-oxobutanoate	638-07-3	CCOC(=O)CC(=O)CCl	164.59	-8		A	9.56	0.05								-5.64659		59010				31.4583
4-Hydroxybutyl prop-2-enoate	2478-10-6	OCCCCOC(=O)C=C	144.17	6.86		A	14.99	0.74								-6.49035		61170				63.1469
Methylhydroquinone	95-71-6	CC1=C(O)C=CC(O)=C1	124.14	128		A	10.79	0.91								-8.57964		61520				64.0221
Hydroquinone	123-31-9	OC1=CC=C(O)C=C1	110.11	170		A	10.33	0.59								-8.71367		72000				56.7667
Tetramethylthiuram monosulfide	97-74-5	CN(C)C(=S)SC(=S)N(C)C	208.36	109.5		B	0.93	0.75								-3.14798		92520				0.230049
Hex-3-yne-2,5-diol	3031-66-1	CC(O)C#CC(C)O	114.15	34.36		A	12.8	-0.1								-5.98541		127600				57.7902
Menadione sodium bisulfite	130-37-0	CC1(CC(=O)C2=C(C=CC=C2)C1=O)S(O)(=O)=O	254.26	185.08		A	-0.14	-0.89								-13.1357		129500				23.6888
Propanedinitrile	109-77-3	N#CCC#N	66.06	32		N		-0.6								-5.27126		133000				79.0111
2,4-Diaminoanisole sulfate	39156-41-7	COC1=CC=C(N)C=C1N	138.17	67.5		B	5.19	-0.31								-8.78865		156800				9.66066
C.I. Acid Orange 7	633-96-5	OC1=C(N=NC2=CC=C(C=C2)S(O)(=O)=O)C2=CC=CC=C2C=C1	328.34	231.55		A	-1.1	2.35								-14.5447		174000				45.7076
Bronopol	52-51-7	OCC(Br)(CO)[N+]([O-])=O	199.99	131.5		A	12.02	-0.64								-9.17104		200000				76.2563
Maleimide	541-59-3	O=C1NC(=O)C=C1	97.07	94		A	8.52	-0.29								-6.58712		210900				7.74403
Antimony potassium tartrate trihydrate	28300-74-5	OC(C(O)C(O)=O)C(O)=O	150.09	147		A	3.07	-1								-8.26795		246000				23.6835
Sodium dimethyldithiocarbamate	128-04-1	CN(C)C(S)=S	121.22	-4.68		A	4.21	0.69								-1.7997		259900				2.22652
Copper dimethyldithiocarbamate	137-29-1	CN(C)C(S)=S	121.22	-4.68		A	4.21	0.69								-1.7997		259900				1.33989
Ferbam	14484-64-1	CN(C)C(S)=S	121.22	-4.68		A	4.21	0.69								-1.7997		259900				0.0298579
1,​2-​Benzenediol	120-80-9	OC1=C(O)C=CC=C1	110.11	105		A	9.5	0.88								-7.30935		461000				55.2905
4,4'-Dithiodimorpholine	103-34-4	C1CN(CCO1)SSN1CCOCC1	236.35	124.5		B	0.78	-1.47								-7.90709		506500				75.0299
Pyrogallol	87-66-1	OC1=CC=CC(O)=C1O	126.11	133		A	9.28	0.97								-12.6053		507000				71.104
Chromium triacetate	1066-30-4	CC(O)=O	60.05	16.64		A	4.79	-0.17								-5.23319		1000000				83.6732
2-(2-Butoxyethoxy)ethanol	112-34-5	CCCCOCCOCCO	162.23	-68		A	14.37	0.56								-6.5312		1000000				95.9385
Mercury(II) acetate	1600-27-7	CC(O)=O	60.05	16.64		A	4.79	-0.17								-5.23319		1000000				2.71955
Sodium (2-pyridylthio)-N-oxide	3811-73-2	O[N+]1=C(S)C=CC=C1	129.18	48.43		A	5.4	-2.75								-10		1000000				0.342608
Potassium silver cyanide	506-61-6	C#N	27.03	-13.4		N		-0.25								-2.26468		1000000				31.7325
Ammonium thioglycolate	5421-46-5	OC(=O)CS	92.11	-16.5		A	3.73	0.09								-6.10073		1000000				73.5645
Tetrakis(hydroxymethyl)phosphonium sulfate	55566-30-8	OCP(CO)(CO)CO	156.12	93.92		A	12.88	-5.03								-10.4262		1000000				75.8594
Norspermidine	56-18-8	NCCCNCCCN	131.22	-14		B	10.5	-1.15								-10.6505		1000000				61.5732
Thallium(I) acetate	563-68-8	CC(O)=O	60.05	16.64		A	4.79	-0.17								-5.23319		1000000				60.886
Isopropanol	67-63-0	CC(C)O	60.1	-89.5		A	15.31	0.05								-3.48004		1000000				83.1673
Acetaldehyde	75-07-0	CC=O	44.05	-123.37		N		-0.34								-2.5644		1000000				3.3223
N-Methyl-2-pyrrolidone	872-50-4	CN1CCCC1=O	99.13	-24		B	-0.41	-0.38								-6.88338		1000000				35.5068

## Sheet: AEID1325
Name	CAS	SMILES	MW (g/mol)	MP (oC)	dSM, J/mol/K	IOC Type	pKa	log KOW,N	log KOW,I	dUOW, J/mol	log KMW,N	log KMW,I	dUMW, J/mol	log KSaW,N	log KSaW,I	log KAW,N	dUAW, J/mol	CSAT,W,N (mg/L)	log KPLASTIC,N m3/m2	log KPLASTIC,I m3/m2	Ksalt	ECx in μM
Vitamin D3	67-97-0	CC(C)CCCC(C)C1CCC2C(CCCC12C)=CC=C1CC(O)CCC1=C	384.65	84.5		A	14.74	10.24								-2.0268		2.224e-05				73.8426
Levothyroxine	51-48-9	NC(CC1=CC(I)=C(OC2=CC(I)=C(O)C(I)=C2)C(I)=C1)C(O)=O	776.88	235.5		A	2.12	4.12								-16.4904		0.0001047				28.3694
4,4'-Butane-1,1-diylbis(2-tert-butyl-5-methylphenol)	85-60-9	CCCC(C1=CC(=C(O)C=C1C)C(C)(C)C)C1=CC(=C(O)C=C1C)C(C)(C)C	382.59	199.79		A	10.44	9.09								-8.39421		0.0002598				22.927
Ivermectin B1a	71827-03-7	CCC(C)C1OC2(CCC1C)CC1CC(CC=C(C)C(OC3CC(OC)C(OC4CC(OC)C(O)C(C)O4)C(C)O3)C(C)C=CC=C3COC4C(O)C(C)=CC(C(=O)O1)C34O)O2	875.12	349.84		A	12.42	4.61								-25.1954		0.0002715				9.59012
2,2'-Methylenebis(ethyl-6-tert-butylphenol)	88-24-4	CCC1=CC(CC2=C(O)C(=CC(CC)=C2)C(C)(C)C)=C(O)C(=C1)C(C)(C)C	368.56	119		A	11.37	8.95								-8.51696		0.0004124				10.0269
Calcitriol	32222-06-3	CC(CCCC(C)(C)O)C1CCC2C(CCCC12C)=CC=C1CC(O)CC(O)C1=C	416.65	115		A	14.44	7.6								-4.90139		0.0007737				25.0985
Tetrabromophenolphthalein ethyl ester	1176-74-5	CCOC(=O)C1=C(C=CC=C1)C(C1=CC(Br)=C(O)C(Br)=C1)=C1C=C(Br)C(=O)C(Br)=C1	661.97	271		A	6.25	6.4								-14.3973		0.0008182				7.60476
Docusate sodium	577-11-7	CCCCC(CC)COC(=O)CC(C(=O)OCC(CC)CCCC)S(O)(=O)=O	422.58	165.48		A	0.08	6.1								-9.68956		0.001227				70.1396
4,4'-Thiobis(6-tert-butyl-m-cresol)	96-69-5	CC1=CC(O)=C(C=C1SC1=C(C)C=C(O)C(=C1)C(C)(C)C)C(C)(C)C	358.54	162		A	10.76	8.24								-9.94762		0.001906				31.5829
2-(8-Heptadecenyl)-2-imidazoline-1-ethanol	95-38-5	CCCCCCCCC=CCCCCCCCC1=NCCN1CCO	350.59	175.53		B	10.08	7.51								-6.64034		0.002354				73.609
1,1,2,2-(4,4',4'',4'''-Tetraglycidyloxyphenyl)ethane	7328-97-4	C(OC1=CC=C(C=C1)C(C(C1=CC=C(OCC2CO2)C=C1)C1=CC=C(OCC2CO2)C=C1)C1=CC=C(OCC2CO2)C=C1)C1CO1	622.72	307.17		N		5.46								-17.8395		0.002485				18.4077
Benzo(a)pyrene	50-32-8	C1=CC2=CC3=CC=C4C=CC=C5C=CC(=C2C=C1)C3=C45	252.32	139.16		N		7.22								-0.189871		0.004581				3.62512
Retinal	116-31-4	CC(C=CC=C(C)C=CC1=C(C)CCCC1(C)C)=CC=O	284.45	63		N		7.6								-1.31665		0.004883				73.6406
Tetrabromobisphenol A bis(2-hydroxyethyl) ether	4162-45-2	CC(C)(C1=CC(Br)=C(OCCO)C(Br)=C1)C1=CC(Br)=C(OCCO)C(Br)=C1	631.98	107		A	13.76	4.97								-11.143		0.005643				44.0266
1,2,5,6,9,10-Hexabromocyclododecane	3194-55-6	BrC1CCC(Br)C(Br)CCC(Br)C(Br)CCC1Br	641.7	180.03		N		7.74								-2.72577		0.0086				50.9522
Oleyl sarcosine	110-25-8	CCCCCCCCC=CCCCCCCCC(=O)N(C)CC(O)=O	353.55	196.12		A	3.62	6.83								-7.57229		0.008645				68.1937
4-Dodecylphenol	104-43-8	CCCCCCCCCCCCC1=CC=C(O)C=C1	262.44	117.12		A	10.14	7.91								-3.2424		0.01347				28.8454
2,2'-Methylenebis(4-methyl-6-tert-butylphenol)	119-47-1	CC1=CC(CC2=CC(C)=CC(=C2O)C(C)(C)C)=C(O)C(=C1)C(C)(C)C	340.51	123		A	11.32	6.25								-8.76322		0.02				25.2774
Pentabromophenol	608-71-9	OC1=C(Br)C(Br)=C(Br)C(Br)=C1Br	488.59	229.5		A	4.43	5.96								-6.63802		0.02605				2.93031
Clotrimazole	23593-75-1	ClC1=C(C=CC=C1)C(N1C=CN=C1)(C1=CC=CC=C1)C1=CC=CC=C1	344.85	148		B	6.12	6.26								-5.89437		0.02984				12.3273
Tribromsalan	87-10-5	OC1=C(Br)C=C(Br)C=C1C(=O)NC1=CC=C(Br)C=C1	449.93	227		A	6	5.97								-9.38421		0.04551				0.566141
Clomiphene citrate (1:1)	50-41-9	CCN(CC)CCOC1=CC=C(C=C1)C(=C(Cl)C1=CC=CC=C1)C1=CC=CC=C1	405.97	186.51		B	9.6	6.74								-7.95078		0.05038				65.4242
Disodium 4,4'-bis(2-sulfostyryl)biphenyl	27344-41-8	OS(=O)(=O)C1=CC=CC=C1C=CC1=CC=C(C=C1)C1=CC=C(C=CC2=CC=CC=C2S(O)(=O)=O)C=C1	518.6	341.04		A	-0.42	4.71								-17.7109		0.05124				28.2669
Bromocresol green sodium salt	62625-32-5	CC1=C(Br)C(O)=C(Br)C=C1C(C1=CC=CC=C1S(O)(=O)=O)=C1C=C(Br)C(=O)C(Br)=C1C	698.02	315.57		A	-0.9	4.01								-18.4224		0.05179				0.0139937
7,12-Dimethylbenz(a)anthracene	57-97-6	CC1=C2C=CC=CC2=C(C)C2=C3C=CC=CC3=CC=C12	256.35	122.5		N		5.8								-3.81334		0.061				21.0487
Econazole nitrate	24169-02-6	ClC1=CC=C(COC(CN2C=CN=C2)C2=C(Cl)C=C(Cl)C=C2)C=C1	381.69	206.82		B	6.68	5.61								-6.87001		0.06464				29.9506
Menthyl anthranilate	134-09-8	CC(C)C1CCC(C)CC1OC(=O)C1=C(N)C=CC=C1	275.39	122.14		B	2.17	6.28								-5.54779		0.07403				23.5663
Crystal Violet lactone	1552-42-7	CN(C)C1=CC=C(C=C1)C1(OC(=O)C2=C1C=CC(=C2)N(C)C)C1=CC=C(C=C1)N(C)C	415.54	234.18		B	4.73	5.27								-10.8661		0.07743				36.2749
Methyl tetradecanoate	124-10-7	CCCCCCCCCCCCCC(=O)OC	242.41	19		N		6.41								-0.668369		0.08744				0.0856824
1-(2-Chlorophenyl)-1-(4-chlorophenyl)-2,2-dichloroethane	53-19-0	ClC(Cl)C(C1=CC=C(Cl)C=C1)C1=C(Cl)C=CC=C1	320.05	77		N		5.87								-3.47631		0.1				33.2748
Perfluorooctanesulfonic acid	1763-23-1	OS(=O)(=O)C(F)(F)C(F)(F)C(F)(F)C(F)(F)C(F)(F)C(F)(F)C(F)(F)C(F)(F)F	500.13	51.9		A	-3.27	4.49								-0.347136		0.1039				158.995
Potassium perfluorooctanesulfonate	2795-39-3	OS(=O)(=O)C(F)(F)C(F)(F)C(F)(F)C(F)(F)C(F)(F)C(F)(F)C(F)(F)C(F)(F)F	500.13	51.9		A	-3.27	4.49								-0.347136		0.1039				73.6353
Lauryl gallate	1166-52-5	CCCCCCCCCCCCOC(=O)C1=CC(O)=C(O)C(O)=C1	338.45	96		A	7.93	6.21								-13.4426		0.1371				38.3792
2,2'-Dibenzoylaminodiphenyl disulfide	135-57-9	O=C(NC1=CC=CC=C1SSC1=C(NC(=O)C2=CC=CC=C2)C=CC=C1)C1=CC=CC=C1	456.58	315.9		N		4.59								-12.7919		0.1617				54.9102
N-(1-Methylheptyl)-N'-phenyl-1,4-benzenediamine	15233-47-3	CCCCCCC(C)NC1=CC=C(NC2=CC=CC=C2)C=C1	296.46	145.77		B	6.7	5.74								-6.61621		0.1627				73.7107
3,3',5,5'-Tetrabromobisphenol A	79-94-7	CC(C)(C1=CC(Br)=C(O)C(Br)=C1)C1=CC(Br)=C(O)C(Br)=C1	543.88	179		A	8.5	6.53								-8.21827		0.171				57.7667
Rotenone	83-79-4	COC1=CC2=C(C=C1OC)C1C(CO2)OC2=C3CC(OC3=CC=C2C1=O)C(C)=C	394.43	176		N		4.1								-11.3393		0.2				0.0886569
3,5-Dichlorosalicyl-3,4-dichloroanilide	1154-59-2	OC1=C(C=C(Cl)C=C1Cl)C(=O)NC1=CC=C(Cl)C(Cl)=C1	351.02	161		A	6.08	5.87								-8.70548		0.2233				10.8074
2,2',2''-[Methanetriyltris(benzene-4,1-diyloxymethanediyl)]trioxirane	66072-38-6	C(OC1=CC=C(C=C1)C(C1=CC=C(OCC2CO2)C=C1)C1=CC=C(OCC2CO2)C=C1)C1CO1	460.53	236.01		N		4.23								-13.4768		0.313				32.7273
1,4-Diaminoanthraquinone	128-95-0	NC1=CC=C(N)C2=C1C(=O)C1=CC=CC=C1C2=O	238.25	268		B	1.17	3								-7.70819		0.33				13.5029
2,4-Di-tert-pentylphenol	120-95-6	CCC(C)(C)C1=CC(=C(O)C=C1)C(C)(C)CC	234.38	25		A	11	6.31								-3.56964		0.4441				38.5515
Tridemorph	24602-86-6	CCCCCCCCCCCCCN1CC(C)OC(C)C1	297.53	105.8		B	7.63	6.38								-3.26795		0.4601				0.0484338
Thioridazine hydrochloride	130-61-0	CSC1=CC2=C(SC3=CC=CC=C3N2CCC2CCCCN2C)C=C1	370.57	73		B	9.84	5.9								-9.21244		0.56				63.4484
Thioridazine	50-52-2	CSC1=CC2=C(SC3=CC=CC=C3N2CCC2CCCCN2C)C=C1	370.57	73		B	9.84	5.9								-9.21244		0.56				40.8976
Triclocarban	101-20-2	ClC1=CC=C(NC(=O)NC2=CC=C(Cl)C(Cl)=C2)C=C1	315.59	255.6		N		4.9								-8.73339		0.6479				5.24828
Dehydroabietylamine acetate	2026-24-6	CC(C)C1=CC2=C(C=C1)C1(C)CCCC(C)(CN)C1CC2	285.48	132.33		B	10.13	6.29								-3.87398		0.6479				73.6173
Guaiazulene	489-84-9	CC(C)C1=CC2=C(C)C=CC2=C(C)C=C1	198.31	31.5		N		5.93								1.03798		0.664				0.163426
Folpet	133-07-3	ClC(Cl)(Cl)SN1C(=O)C2=C(C=CC=C2)C1=O	296.56	177		B	-3.34	2.85								-5.5043		0.8				9.15234
Chlorothalonil	1897-45-6	ClC1=C(Cl)C(C#N)=C(Cl)C(C#N)=C1Cl	265.91	252.1		N		2.9								-4.99059		0.81				2.10382
3-Hydroxy-N-(3-nitrophenyl)naphthalene-2-carboxamide	135-65-9	OC1=CC2=C(C=CC=C2)C=C1C(=O)NC1=CC=CC(=C1)[N+]([O-])=O	308.3	231.24		A	8.65	5.01								-11.5989		0.8981				12.34
Tolylfluanid	731-27-1	CN(C)S(=O)(=O)N(SC(F)(Cl)Cl)C1=CC=C(C)C=C1	347.25	96		B	-5.06	3.9								-4.50714		0.9				85.404
Binapacryl	485-31-4	CCC(C)C1=CC(=CC(=C1OC(=O)C=C(C)C)[N+]([O-])=O)[N+]([O-])=O	322.32	70		N		4.49								-5.26142		1				13.7445
2-Hydroxyanthraquinone	605-32-3	OC1=CC2=C(C=C1)C(=O)C1=CC=CC=C1C2=O	224.22	306		A	7.41	2.86								-9.12371		1.1				41.4607
Dichlofluanid	1085-98-9	CN(C)S(=O)(=O)N(SC(F)(Cl)Cl)C1=CC=CC=C1	333.22	106		B	-5.37	3.7								-5.81104		1.3				56.393
Dienestrol	84-17-3	CC=C(C(=CC)C1=CC=C(O)C=C1)C1=CC=C(O)C=C1	266.34	152.48		A	10.18	5.43								-9.77048		1.694				3.63547
2-Ethylhexyl p-hydroxybenzoate	5153-25-3	CCCCC(CC)COC(=O)C1=CC=C(O)C=C1	250.34	108.87		A	8.2	5.36								-5.97023		2.365				65.8139
Diclofenac sodium	15307-79-6	OC(=O)CC1=C(NC2=C(Cl)C=CC=C2Cl)C=CC=C1	296.15	174.6		A	4.18	4.51								-9.71367		2.37				51.9916
Chlorpromazine	50-53-3	CN(C)CCCN1C2=C(SC3=C1C=C(Cl)C=C3)C=CC=C2	318.87	167.13		B	9.41	5.41								-7.8215		2.55				13.1058
Chlorpromazine hydrochloride	69-09-0	CN(C)CCCN1C2=C(SC3=C1C=C(Cl)C=C3)C=CC=C2	318.87	167.13		B	9.41	5.41								-7.8215		2.55				25.2153
N-[3-(Dimethylamino)propyl]dodecanamide	3179-80-4	CCCCCCCCCCCC(=O)NCCCN(C)C	284.49	150.12		B	9.45	4.4								-7.82624		2.623				54.8981
N-(1,3-Dimethylbutyl)-N'-phenyl-p-phenylenediamine	793-24-8	CC(C)CC(C)NC1=CC=C(NC2=CC=CC=C2)C=C1	268.41	121.5		B	6.73	4.47								-6.86219		2.841				45.6524
Tricyclodecanedimethanol diacrylate	42594-17-2	C=CC(=O)OCC1CCC2C3CC(CC3COC(=O)C=C)C12	304.39	21.14		N		4.22								-5.03635		2.877				53.1604
Dipyridamole	58-32-2	OCCN(CCO)C1=NC(N2CCCCC2)=C2N=C(N=C(N3CCCCC3)C2=N1)N(CCO)CCO	504.64	163		B	6.47	2.74								-20.0726		3.063				20.5422
3,3'-Dichlorobenzidine dihydrochloride	612-83-9	NC1=C(Cl)C=C(C=C1)C1=CC(Cl)=C(N)C=C1	253.13	132		B	2.7	3.51								-8.93521		3.1				21.014
Hexyl hexanoate	6378-65-0	CCCCCCOC(=O)CCCCC	200.32	-50		N		4.79								-1.03635		3.517				0.0209651
Methyl red	493-52-7	CN(C)C1=CC=C(C=C1)N=NC1=CC=CC=C1C(O)=O	269.31	183		A	3.66	3.83								-9.71551		3.672				31.9477
Bisphenol A diglycidyl ether	1675-54-3	CC(C)(C1=CC=C(OCC2CO2)C=C1)C1=CC=C(OCC2CO2)C=C1	340.42	8		N		3.84								-8.74606		3.685				68.3244
Digoxin	20830-75-5	CC1OC(CC(O)C1O)OC1C(O)CC(OC2C(O)CC(OC3CCC4(C)C(CCC5C4CC(O)C4(C)C(CCC54O)C4=CC(=O)OC4)C3)OC2C)OC1C	780.96	349.84		A	13.5	0.5								-24.7201		3.776				0.0157641
17beta-Estradiol	50-28-2	CC12CCC3C(CCC4=C3C=CC(O)=C4)C1CCC2O	272.39	221.5		A	10.27	4.01								-8.82743		3.9				19.0302
Bisphenol AF	1478-61-1	OC1=CC=C(C=C1)C(C1=CC=C(O)C=C1)(C(F)(F)F)C(F)(F)F	336.24	161		A	8.74	4.47								-7.63418		4.302				63.2648
4-(1,1,3,3-Tetramethylbutyl)phenol	140-66-9	CC(C)(C)CC(C)(C)C1=CC=C(O)C=C1	206.33	84.5		A	10.15	5.28								-3.73532		4.821				95.7581
N-Dodecanoyl-N-methylglycine	97-78-9	CCCCCCCCCCCC(=O)N(C)CC(O)=O	271.4	149.42		A	3.62	4.1								-8.25499		5.659				73.6299
1,2,3,4-Tetrachlorobenzene	634-66-2	ClC1=C(Cl)C(Cl)=C(Cl)C=C1	215.89	47.5		N		4.6								-1.50771		5.92				0.000660621
N-Phenyl-2-naphthylamine	135-88-6	N(C1=CC=CC=C1)C1=CC=C2C=CC=CC2=C1	219.29	108		B	0.78	4.38								-5.37569		6.311				73.6738
Fenbendazole	43210-67-9	COC(=O)NC1=NC2=CC(SC3=CC=CC=C3)=CC=C2N1	299.35	233		A	7.42	3.85								-12.451		6.379				0.0893372
o-Aminoazotoluene	97-56-3	CC1=C(N)C=CC(=C1)N=NC1=C(C)C=CC=C1	225.3	102		B	3.01	4.29								-5.8861		7				54.9143
Curcumin	458-37-7	COC1=CC(C=CC(=O)CC(=O)C=CC2=CC(OC)=C(O)C=C2)=CC=C1O	368.39	183		A	8.11	3.29								-19.541		7.475				7.50291
Dichlone	117-80-6	ClC1=C(Cl)C(=O)C2=C(C=CC=C2)C1=O	227.05	195		N		2.83								-7.37993		8				18.649
Teniposide	29767-20-2	COC1=CC(=CC(OC)=C1O)C1C2C(COC2=O)C(OC2OC3COC(OC3C(O)C2O)C2=CC=CS2)C2=C1C=C1OCOC1=C2	656.66	349.84		A	9.94	1.08								-29.6266		8.127				1.30235
Ethyl (2E,4Z)-deca-2,4-dienoate	3025-30-7	CCCCCC=CC=CC(=O)OCC	196.29	10.62		N		4.36								-1.51116		8.588				81.8329
Griseofulvin	126-07-8	COC1=CC(OC)=C(Cl)C2=C1C(=O)C1(O2)C(C)CC(=O)C=C1OC	352.77	220		N		2.18								-11.2362		8.64				23.8433
2,5-Di-tert-butylbenzene-1,4-diol	88-58-4	CC(C)(C)C1=CC(O)=C(C=C1O)C(C)(C)C	222.33	217		A	11.89	4.85								-7.79858		9.145				73.6174
1-Chloro-2,4-dinitrobenzene	97-00-7	[O-][N+](=O)C1=CC(=C(Cl)C=C1)[N+]([O-])=O	202.55	53		N		2.17								-3.99936		9.24				24.4574
1-(1-(4,4-bis(4-fluorophenyl)butyl)-4-piperidinyl)-1,3-dihydro-2H-Benzimidazol-2-one	2062-78-4	FC1=CC=C(C=C1)C(CCCN1CCC(CC1)N1C(=O)NC2=C1C=CC=C2)C1=CC=C(F)C=C1	461.56	214		B	9.26	6.3								-11.3471		10				18.9063
Triclosan	3380-34-5	OC1=C(OC2=CC=C(Cl)C=C2Cl)C=CC(Cl)=C1	289.55	54		A	7.8	4.76								-6.69043		10				80.4283
Ketoconazole	65277-42-1	CC(=O)N1CCN(CC1)C1=CC=C(OCC2COC(CN3C=CN=C3)(O2)C2=CC=C(Cl)C=C2Cl)C=C1	531.44	146		B	6.88	4.34								-17.6411		10				45.8303
Trifluoperazine dihydrochloride	440-17-5	CN1CCN(CCCN2C3=C(SC4=C2C=C(C=C4)C(F)(F)F)C=CC=C3)CC1	407.5	190.35		B	7.66	5.03								-10.2882		12.2				40.8908
Pentachlorophenol	87-86-5	OC1=C(Cl)C(Cl)=C(Cl)C(Cl)=C1Cl	266.34	174		A	4.68	5.12								-5.99936		14				3.84573
4,4'-Methylenebis(N,N-diglycidylaniline)	28768-32-3	C(C1CO1)N(CC1CO1)C1=CC=C(CC2=CC=C(C=C2)N(CC2CO2)CC2CO2)C=C1	422.53	217.69		B	4.58	2.53								-14.4612		15.33				32.0824
Sodium myristyl sulfate	1191-50-0	CCCCCCCCCCCCCCOS(O)(=O)=O	294.45	146.62		A	-3.29	3.4								-4.87798		16.38				61.7564
3-Hydroxy-2-naphthoic o-anisidide	135-62-6	COC1=CC=CC=C1NC(=O)C1=CC2=C(C=CC=C2)C=C1O	293.32	216.28		A	8.74	3.99								-10.4229		19.97				15.2552
Ethacrynic acid	58-54-8	CCC(=C)C(=O)C1=CC=C(OCC(O)=O)C(Cl)=C1Cl	303.14	122.5		A	2.81	3.69								-9.12371		20.59				26.7654
N-(Cyclohexylthio)phthalimide	17796-82-6	O=C1N(SC2CCCCC2)C(=O)C2=C1C=CC=C2	261.34	92.6		B	-2.91	3.66								-5.58235		22				67.9498
2,3,4,6-Tetrachlorophenol	58-90-2	OC1=C(Cl)C(Cl)=C(Cl)C=C1Cl	231.89	70		A	5.64	4.45								-3.44208		23				22.9795
Maprotiline hydrochloride	10347-81-6	CNCCCC12CCC(C3=CC=CC=C13)C1=CC=CC=C21	277.41	93		B	10.62	4.52								-5.48707		23.36				73.6115
4-Nitro-N-phenylaniline	836-30-6	[O-][N+](=O)C1=CC=C(NC2=CC=CC=C2)C=C1	214.23	135.3		B	-2.6	3.74								-6.77153		23.62				42.0543
Alprostadil	745-65-3	CCCCCC(O)C=CC1C(O)CC(=O)C1CCCCCCC(O)=O	354.49	217.9		A	4.77	3.2								-12.1381		26.74				15.3321
Carbendazim	10605-21-7	COC(=O)NC1=NC2=CC=CC=C2N1	191.19	300		A	7.79	1.52								-9.06219		29				8.26601
Dichlorophen	97-23-4	OC1=CC=C(Cl)C=C1CC1=CC(Cl)=CC=C1O	269.13	177.5		A	9.15	4.26								-10.3278		30				28.7006
2,4-Di-tert-butylphenol	96-76-4	CC(C)(C)C1=CC(=C(O)C=C1)C(C)(C)C	206.33	56.5		A	11.56	5.19								-3.81566		35				64.9763
2,4-Diisopropylphenol	2934-05-6	CC(C)C1=CC(C(C)C)=C(O)C=C1	178.28	55.74		A	10.76	4.42								-4.06219		35.52				69.4282
Periciazine	2622-26-6	OC1CCN(CCCN2C3=CC=CC=C3SC3=CC=C(C=C23)C#N)CC1	365.5	116		B	8.54	3.52								-14.1308		38				25.4443
Daunorubicin	20830-81-3	COC1=CC=CC2=C1C(=O)C1=C(C(O)=C3CC(O)(CC(OC4CC(N)C(O)C(C)O4)C3=C1O)C(C)=O)C2=O	527.53	208		B	8.68	1.83								-23.2332		39.17				0.573636
2-(Thiocyanomethylthio)benzothiazole	21564-17-0	N#CSCSC1=NC2=CC=CC=C2S1	238.34	-10		B	-0.09	3.23								-5.53972		40				16.3931
2-(4-Aminophenyl)-6-methylbenzothiazole sulfonic acid	130-17-6	CC1=C(C2=C(C=C1)N=C(S2)C1=CC=C(N)C=C1)S(O)(=O)=O	320.38	238.36		A	-0.28	0.41								-15.67		41.99				32.7653
Sodium deoxycholate	302-95-4	CC(CCC(O)=O)C1CCC2C3CCC4CC(O)CCC4(C)C3CC(O)C12C	392.58	177		A	4.76	3.5								-9.23931		43.6				73.7255
Dipentaerythritol pentaacrylate	60506-81-2	OCC(COCC(COC(=O)C=C)(COC(=O)C=C)COC(=O)C=C)(COC(=O)C=C)COC(=O)C=C	524.53	210.57		A	13.79	1.79								-19.4113		48.15				54.8013
6-(1-Methylethyl)quinoline	135-79-5	CC(C)C1=CC2=CC=CN=C2C=C1	171.24	65.13		B	5.12	3.6								-4.26142		51.26				32.6975
Sodium tridecyl sulfate	3026-63-9	CCCCCCCCCCCCCOS(O)(=O)=O	280.43	145.1		A	-3.29	2.91								-5.00114		51.84				72.3542
Dinoseb	88-85-7	CCC(C)C1=CC(=CC(=C1O)[N+]([O-])=O)[N+]([O-])=O	240.22	40		A	4.08	3.56								-4.72956		52				10.7485
7-Diethylamino-4-methylcoumarin	91-44-1	CCN(CC)C1=CC=C2C(C)=CC(=O)OC2=C1	231.3	72		B	3.51	3.22								-4.90423		53.28				56.8464
Auramine hydrochloride	2465-27-2	CN(C)C1=CC=C(C=C1)C(=N)C1=CC=C(C=C1)N(C)C	267.38	136		B	10.12	2.98								-6.82743		53.54				0.746213
Diisopropyl adipate	6938-94-9	CC(C)OC(=O)CCCCC(=O)OC(C)C	230.31	-1.1		N		3.2								-3.90709		55.61				62.3615
Bismaleimide	13676-54-5	O=C1C=CC(=O)N1C1=CC=C(CC2=CC=C(C=C2)N2C(=O)C=CC2=O)C=C1	358.36	298.31		B	-0.4	2.32								-15.3432		57.57				59.997
Trimethylolpropane triacrylate	15625-89-5	CCC(COC(=O)C=C)(COC(=O)C=C)COC(=O)C=C	296.32	27.19		N		2.75								-7.60965		57.81				19.2358
Etoposide	33419-42-0	COC1=CC(=CC(OC)=C1O)C1C2C(COC2=O)C(OC2OC3COC(C)OC3C(O)C2O)C2=C1C=C1OCOC1=C2	588.57	236		A	9.94	0.6								-28.1455		58.7				1.89277
3,3'-Dimethoxybenzidine dihydrochloride	20325-40-0	COC1=CC(=CC=C1N)C1=CC(OC)=C(N)C=C1	244.3	137		B	4.71	1.81								-11.1308		60				60.8803
N-Phenyl-1-naphthylamine	90-30-2	N(C1=CC=CC=C1)C1=C2C=CC=CC2=CC=C1	219.29	62		B	0.78	4.2								-5.37569		60				174.336
2,4,6-Tribromophenol	118-79-6	OC1=C(Br)C=C(Br)C=C1Br	330.8	95.5		A	6.34	4.13								-5.8383		70				49.7421
Mebendazole	31431-39-7	COC(=O)NC1=NC2=C(N1)C=CC(=C2)C(=O)C1=CC=CC=C1	295.3	288.5		A	7.44	2.83								-13.6594		71.3				0.236412
2-Tert-Butyl-5-methylphenol	88-60-8	CC1=CC(O)=C(C=C1)C(C)(C)C	164.25	46.5		A	11.45	4.11								-4.18441		76.88				51.3959
Dodecylamine hydrochloride	929-73-7	CCCCCCCCCCCCN	185.36	69.5		B	10.67	4.76								-2.15553		78				73.6177
Lauryldiethanolamine	1541-67-9	CCCCCCCCCCCCN(CCO)CCO	273.46	131.43		B	8.85	3.9								-7.10073		83.13				49.015
Pentaerythritol tetraacrylate	4986-89-4	C=CC(=O)OCC(COC(=O)C=C)(COC(=O)C=C)COC(=O)C=C	352.34	53.05		N		2.11								-10.6342		94.62				48.7526
Dimethyl nonanedioate	1732-10-1	COC(=O)CCCCCCCC(=O)OC	216.28	-37.87		N		2.86								-4.02869		130				32.7432
Safranal	116-26-7	CC1=C(C=O)C(C)(C)CC=C1	150.22	20.87		N		3.22								-2.25819		134.2				0.000389675
Hexachlorophene	70-30-4	OC1=C(CC2=C(Cl)C(Cl)=CC(Cl)=C2O)C(Cl)=C(Cl)C=C1Cl	406.91	166.5		A	6.49	7.54								-10.454		140				11.9363
Clorophene	120-32-1	OC1=C(CC2=CC=CC=C2)C=C(Cl)C=C1	218.68	48.5		A	9.81	3.6								-6.95716		149				40.2319
3-Iodo-2-propynyl-N-butylcarbamate	55406-53-6	CCCCNC(=O)OCC#CI	281.09	66		A	12.03	2.45								-5.30935		156				15.6239
Bis(2-ethylhexyl) phosphate	298-07-7	CCCCC(CC)COP(O)(=O)OCC(CC)CCCC	322.43	-50		A	1.47	6.07								-5.77469		182				61.1163
Apigenin	520-36-5	OC1=CC=C(C=C1)C1=CC(=O)C2=C(O1)C=C(O)C=C2O	270.24	345		A	6.53	3.02								-14.6793		182.5				13.9628
2-Methyl-4,6-dinitrophenol	534-52-1	CC1=C(O)C(=CC(=C1)[N+]([O-])=O)[N+]([O-])=O	198.14	86.6		A	4.42	2.13								-4.2424		198				38.8322
2,4-Dichloro-3,5-dimethylphenol	133-53-9	CC1=CC(O)=C(Cl)C(C)=C1Cl	191.06	83		A	8.3	3.9								-4.8145		200				66.9541
2-tert-Butyl-4-methoxyphenol	121-00-6	COC1=CC=C(O)C(=C1)C(C)(C)C	180.25	51		A	11.83	3.5								-5.45605		212.8				73.6464
Chloranil	118-75-2	ClC1=C(Cl)C(=O)C(Cl)=C(Cl)C1=O	245.88	290		N		2.22								-7.87398		250				73.6133
Melphalan	148-82-3	NC(CC1=CC=C(C=C1)N(CCCl)CCCl)C(O)=O	305.21	182.5		A	2.12	-0.52								-10.7663		270.9				22.2985
Azathioprine	446-86-6	CN1C=NC(=C1SC1=NC=NC2=C1NC=N2)[N+]([O-])=O	277.26	243.5		A	8.29	0.1								-12.9669		272.3				33.0037
Bisphenol A	80-05-7	CC(C)(C1=CC=C(O)C=C1)C1=CC=C(O)C=C1	228.29	153		A	10.29	3.32								-8.78647		300				73.8403
Zinc dibutyldithiocarbamate	136-23-2	CCCCN(CCCC)C(S)=S	205.38	60.67		A	3.36	3.64								-1.06015		327.1				12.6761
Methyl 4-methylbenzoate	99-75-2	COC(=O)C1=CC=C(C)C=C1	150.18	33.2		N		2.7								-2.80533		374.5				0.000139209
1,10-Phenanthroline	66-71-7	C1=CC2=C(N=C1)C1=C(C=CC=N1)C=C2	180.21	78		B	5.16	2.51								-8.44405		376				51.5348
2,2',4,4'-Tetrahydroxybenzophenone	131-55-5	OC1=CC(O)=C(C=C1)C(=O)C1=CC=C(O)C=C1O	246.22	200		A	6.98	2.78								-13.831		398.5				103.095
1-Fluoro-2,4-dinitrobenzene	70-34-8	[O-][N+](=O)C1=CC=C(F)C(=C1)[N+]([O-])=O	186.1	25.8		N		1.83								-5.39775		400				73.6556
Michler's ketone	90-94-8	CN(C)C1=CC=C(C=C1)C(=O)C1=CC=C(C=C1)N(C)C	268.36	179		B	2.55	3.87								-7.69745		400				0.531452
Oxfendazole	53716-50-0	COC(=O)NC1=NC2=C(N1)C=CC(=C2)S(=O)C1=CC=CC=C1	315.35	253		A	7.2	1.63								-16.6513		407.2				12.1641
8-Hydroxyquinoline sulfate	134-31-6	OC1=CC=CC2=CC=CN=C12	145.16	226		B	10.26	1.85								-4.63265		417				61.8859
5-Nitroindazole	5401-94-5	[O-][N+](=O)C1=CC=C2NN=CC2=C1	163.14	124.43		N		2.06								-7.23624		469.5				1.25049
4-Hexylresorcinol	136-77-6	CCCCCCC1=C(O)C=C(O)C=C1	194.28	68		A	10	3.45								-7.96528		500				51.7029
Octhilinone	26530-20-1	CCCCCCCCN1SC=CC1=O	213.34	113.04		B	-2.04	2.45								-6.07256		500				24.4843
7-(Dimethylamino)-4-methylcoumarin	87-01-4	CN(C)C1=CC2=C(C=C1)C(C)=CC(=O)O2	203.24	101.89		B	1.91	2.24								-5.15048		516.9				52.2821
2-Methyl-4-propyl-1,3-oxathiane	67715-80-4	CCCC1CCOC(C)S1	160.28	11.23		N		2.35								-3.16581		672.1				1.2297
2,4-Dichlorophenoxyacetic acid	94-75-7	OC(=O)COC1=C(Cl)C=C(Cl)C=C1	221.04	138		A	2.98	2.81								-6.42427		682				1.917e-05
FD&C Red 3	16423-68-0	OC1=C(I)C2=C(C=C1I)C1(OC(=O)C3=CC=CC=C13)C1=C(O2)C(I)=C(O)C(I)=C1	835.9	303		A	7.21	8.02								-16.9786		700				63.3016
C.I. Acid Blue 74	860-22-0	OS(=O)(=O)C1=CC2=C(NC(C2=O)C2=NC3=C(C=C(C=C3)S(O)(=O)=O)C2=O)C=C1	422.39	309.8		B	-0.06	-1.82								-21.9231		797				1.21302e-05
4,4'-Biphenyldiol	92-88-6	OC1=CC=C(C=C1)C1=CC=C(O)C=C1	186.21	283		A	9.74	2.8								-9.73725		798.2				46.1772
1,4-Cyclohexanedicarboxylic acid	1076-97-7	OC(=O)C1CCC(CC1)C(O)=O	172.18	312.5		A	4.38	0.95								-9.51871		800				73.6286
Diphenoxylate hydrochloride	3810-80-8	CCOC(=O)C1(CCN(CCC(C#N)(C2=CC=CC=C2)C2=CC=CC=C2)CC1)C1=CC=CC=C1	452.6	244.27		B	7.28	6.34								-11.7277		800				21.1189
Chlorhexidine	55-56-1	ClC1=CC=C(NC(=N)NC(=N)NCCCCCCNC(=N)NC(=N)NC2=CC=C(Cl)C=C2)C=C1	505.46	154		B	11.51	0.08								-28.3354		800				25.1648
Chlorhexidine diacetate	56-95-1	ClC1=CC=C(NC(=N)NC(=N)NCCCCCCNC(=N)NC(=N)NC2=CC=C(Cl)C=C2)C=C1	505.46	154		B	11.51	0.08								-28.3354		800				62.3467
N,N-Diethyl-p-phenylenediamine	93-05-0	CCN(CC)C1=CC=C(N)C=C1	164.25	65.55		B	8.21	2.24								-5.6618		806.1				59.9532
2,4,4'-Trihydroxybenzophenone	1470-79-7	OC1=CC=C(C=C1)C(=O)C1=CC=C(O)C=C1O	230.22	170.29		A	7.59	2.48								-12.9492		873.4				73.6004
Thymol	89-83-8	CC(C)C1=CC=C(C)C=C1O	150.22	49.6		A	10.59	3.3								-3.84322		900				73.6333
3-(Triethoxysilyl)propionitrile	919-31-3	CCO[Si](CCC#N)(OCC)OCC	217.34	-30.26		N		1.51								-4.71001		982.3				32.7637
Tris(2,3-epoxypropyl)isocyanurate	2451-62-9	O=C1N(CC2CO2)C(=O)N(CC2CO2)C(=O)N1CC1CO1	297.27	219.54		B	-2.44	1.21								-18.4149		1191				23.9973
3,3'-Dimethylbenzidine dihydrochloride	612-82-8	CC1=CC(=CC=C1N)C1=CC=C(N)C(C)=C1	212.3	131		B	4.59	2.34								-8.58988		1300				50.5502
N-Benzyladenine	1214-39-7	C(NC1=C2N=CN=C2N=CN1)C1=CC=CC=C1	225.25	189.35		B	9.36	1.61								-8.82862		1364				6.43989
N,N-Dimethyl-4-nitrosoaniline	138-89-6	CN(C)C1=CC=C(C=C1)N=O	150.18	92.5		B	-0.9	2.04								-4.43622		1369				73.6675
4'-Chloro-2',5'-dimethoxyacetoacetanilide	4433-79-8	COC1=CC(NC(=O)CC(C)=O)=C(OC)C=C1Cl	271.7	174.21		A	10.75	1.25								-12.3551		1528				48.2885
4-Isopropylbenzyl alcohol	536-60-7	CC(C)C1=CC=C(CO)C=C1	150.22	28		A	14.48	2.53								-4.76219		1687				5.75554
Diglycidyl resorcinol ether	101-90-6	C(OC1=CC(OCC2CO2)=CC=C1)C1CO1	222.24	42.5		N		1.23								-7.94137		2957				58.8828
4-(Diglycidylamino)phenyl glycidyl ether	5026-74-4	C(OC1=CC=C(C=C1)N(CC1CO1)CC1CO1)C1CO1	277.32	127.53		B	4.78	0.87								-10.6767		2996				25.066
Ethyl cyanoacrylate	7085-85-0	CCOC(=O)C(=C)C#N	125.13	-22.5		N		1.42								-4.95078		3213				0.570004
Triamterene	396-01-0	NC1=NC(N)=C2N=C(C(N)=NC2=N1)C1=CC=CC=C1	253.27	316		B	6.19	0.98								-16.119		3303				21.6255
(9Z,12R)-12-Hydroxyoctadec-9-enoic acid	141-22-0	CCCCCCC(O)CC=CCCCCCCCC(O)=O	298.47	5.5		A	4.78	6.19								-7.17368		3460				73.6209
Dimethipin	55290-64-7	CC1=C(C)S(=O)(=O)CCS1(=O)=O	210.26	165		N		-0.17								-9.0268		4600				6.56038
3-Trifluoromethyl-4-nitrophenol	88-30-2	OC1=CC(=C(C=C1)[N+]([O-])=O)C(F)(F)F	207.11	76		A	6.07	2.87								-6.10523		5000				16.1529
4-Methylumbelliferone	90-33-5	CC1=CC(=O)OC2=C1C=CC(O)=C2	176.17	195.5		A	8	1.9								-7.33545		5210				52.9245
1,2-Benzenedicarboxaldehyde	643-79-8	O=CC1=CC=CC=C1C=O	134.14	55		N		1.43								-5.86348		5346				5.00732
Quercetin	117-39-5	OC1=CC2=C(C(O)=C1)C(=O)C(=O)C(O2)C1=CC(O)=C(O)C=C1	302.24	225.69		A	5.42	1.08								-20.5776		5436				20.7681
Sotalol hydrochloride	959-24-0	CC(C)NCC(O)C1=CC=C(NS(C)(=O)=O)C=C1	272.36	206.5		B	9.31	0.24								-11.9923		5513				0.000647678
Pentaerythritol triacrylate	3524-68-3	OCC(COC(=O)C=C)(COC(=O)C=C)COC(=O)C=C	298.3	40.12		A	13.63	0.91								-12.1684		6832				6.57205
2-Hexyloxyethanol	112-25-4	CCCCCCOCCO	146.23	-45.1		A	14.44	1.86								-3.89437		9900				15.0887
N-Methyl-p-aminophenol sulfate	55-55-0	CNC1=CC=C(O)C=C1	123.16	135		B	5.91	0.79								-7.75004		10000				72.9954
Nitrogen mustard hydrochloride	55-86-7	CN(CCCl)CCCl	156.06	-60		B	6.4	0.91								-3.92464		12000				47.7755
Pyrazineethanethiol	35250-53-4	SCCC1=CN=CC=N1	140.2	46.54		A	9.82	0.92								-5.20668		13630				39.2806
Ninhydrin	485-47-2	OC1(O)C(=O)C2=C(C=CC=C2)C1=O	178.15	242		A	8.47	0.67								-8.85961		15060				35.5643
4-Aminophenol	123-30-8	NC1=CC=C(O)C=C1	109.13	187.5		B	5.28	0.04								-7.83343		16000				21.0957
2-Aminophenol	95-55-6	NC1=C(O)C=CC=C1	109.13	174		A	9.76	0.62								-8.09186		20000				35.0304
Ethane-1,2-diyl bis(sulfanylacetate)	123-81-9	SCC(=O)OCCOC(=O)CS	210.26	-20.05		A	7.51	0.29								-7.54467		21800				49.6052
2-Hydroxy-2-methylpropiophenone	7473-98-5	CC(C)(O)C(=O)C1=CC=CC=C1	164.21	54.49		A	13.23	1.08								-3.95716		25340				14.99
Zinc diethyldithiocarbamate	14324-55-1	CCN(CC)C(S)=S	149.27	18.16		A	5.42	1.67								-1.55347		28990				5.81933
3,3',4,4'-Tetraaminobiphenyl tetrahydrochloride	7411-49-6	NC1=CC=C(C=C1N)C1=CC(N)=C(N)C=C1	214.27	175		B	4.39	0.09								-15.579		30980				60.4661
6-Thioguanine	154-42-7	NC1=NC2=C(NC=N2)C(=S)N1	167.19	219.26		A	6.57	-0.07								-12.722		36300				1.47933
Pentaerythritol dibromide	3296-90-0	OCC(CO)(CBr)CBr	261.94	113		A	13.57	1.06								-6.78		38000				0.0448916
N,N'-Diethylthiourea	105-55-5	CCNC(=S)NCC	132.22	77.45		N		0.57								-9.40762		42000				0.0155901
Methylene bis(thiocyanate)	6317-18-6	N#CSCSC#N	130.18	52.13		N		0.34								-5.97189		47040				19.6182
6-Mercaptopurine	50-44-2	S=C1NC=NC2=C1N=CN2	152.17	202.65		A	8.38	-0.25								-8.73435		61070				5.79775
2,4-Diaminotoluene	95-80-7	CC1=C(N)C=C(N)C=C1	122.17	99		B	5.02	0.14								-7.51754		74820				94.9153
2-Butenoic acid	3724-65-0	CC=CC(O)=O	86.09	72		A	4.68	0.72								-5.56505		86000				15.7652
Cytarabine	147-94-4	NC1=NC(=O)N(C=C1)C1OC(CO)C(O)C1O	243.22	212.5		N		-2.51								-17.1926		175700				0.359959
L-Arginine	74-79-3	NC(CCCNC(N)=N)C(O)=O	174.2	217		A	2.49	-4.2								-16.1261		182000				33.9592
Esculin	531-75-9	OCC1OC(OC2=CC3=C(OC(=O)C=C3)C=C2O)C(O)C(O)C1O	340.29	205		A	7	-1.71								-20.201		206000				13.8117
Maleimide	541-59-3	O=C1NC(=O)C=C1	97.07	94		A	8.52	-0.29								-6.58712		210900				54.8974
Sodium 3-nitrobenzenesulfonate	127-68-4	OS(=O)(=O)C1=CC=CC(=C1)[N+]([O-])=O	203.17	140.4		A	-1.21	-1.35								-9.39158		242900				93.2844
7a-Ethyldihydro-1H,3H,5H-oxazolo(3,4-c)oxazole	7747-35-5	CCC12COCN1COC2	143.19	15.43		B	5.23	0.4								-4.55411		374600				0.024502
1,​2-​Benzenediol	120-80-9	OC1=C(O)C=CC=C1	110.11	105		A	9.5	0.88								-7.30935		461000				73.6477
Formamide	75-12-7	NC=O	45.04	2.55		N		-1.51								-7.24551		1000000				0.00187363
Chromium triacetate	1066-30-4	CC(O)=O	60.05	16.64		A	4.79	-0.17								-5.23319		1000000				63.4162
1,4-Dioxane	123-91-1	C1COCCO1	88.11	11.8		N		-0.27								-3.70729		1000000				1.0474e-05
Mercury(II) acetate	1600-27-7	CC(O)=O	60.05	16.64		A	4.79	-0.17								-5.23319		1000000				29.5287
Streptomycin sulfate (2:3)	3810-74-0	CNC1C(O)C(O)C(CO)OC1OC1C(OC2C(O)C(O)C(NC(N)=N)C(O)C2NC(N)=N)OC(C)C1(O)C=O	581.58	349.84		B	13.1	-7.53								-41.4637		1000000				3.27517
Potassium silver cyanide	506-61-6	C#N	27.03	-13.4		N		-0.25								-2.26468		1000000				69.7477
Ammonium thioglycolate	5421-46-5	OC(=O)CS	92.11	-16.5		A	3.73	0.09								-6.10073		1000000				63.9172
Thallium(I) acetate	563-68-8	CC(O)=O	60.05	16.64		A	4.79	-0.17								-5.23319		1000000				70.6796
Acetaldehyde	75-07-0	CC=O	44.05	-123.37		N		-0.34								-2.5644		1000000				68.1056
2-[{2-[2-(Dimethylamino)ethoxy]ethyl}(methyl)amino]ethanol	83016-70-0	CN(C)CCOCCN(C)CCO	190.29	55.79		B	8.88	-1.51								-12.1308		1000000				1.63446
2-(2-Aminoethoxy)ethanol	929-06-6	NCCOCCO	105.14	13.94		B	8.68	-1.89								-9.63113		1000000				0.0244725
